# Supplementary material for: Trajectory surface hopping molecular dynamics simulations for retinal protonated Schiff-base photoisomerization
Source: Royal Society of Chemistry journal article supplement (doi:10.1039/d1cp03401d), 2021-01-01
Supplement: d1cp03401d1.pdf [file d1cp03401d1.pdf]

## Supplementary information for

### **Trajectory surface hopping molecular dynamics simulations for retinal protonated Schiff-base photoisomerization**

Yuxiu Liu<sup>a</sup> and Chaoyuan Zhu<sup>\*ab</sup>

*<sup>a</sup>Department of Applied Chemistry and Institute of Molecular Science, National  
Chiao-Tung University, Hsinchu 30010, Taiwan.*

*<sup>b</sup>Department of Applied Chemistry and Center for Emergent Functional Matter  
Science, National Yang Ming Chiao Tung University, Hsinchu 30010, Taiwan*

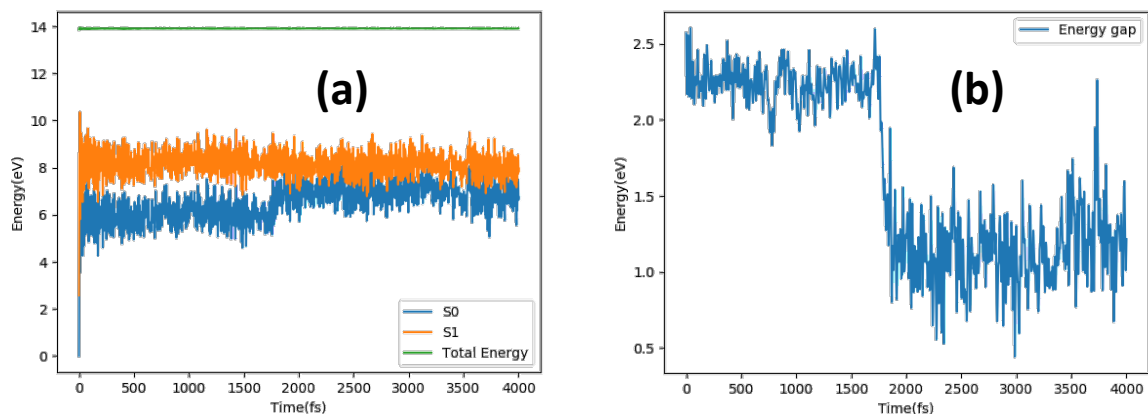

**Fig. S1** One resonance trajectory evolution starting from Franck-Condon region on S<sub>1</sub> state at all-trans isomer up to 4000fs simulation. (a) Potential energy surfaces and (b) energy gap between S<sub>1</sub> and S<sub>0</sub> states.

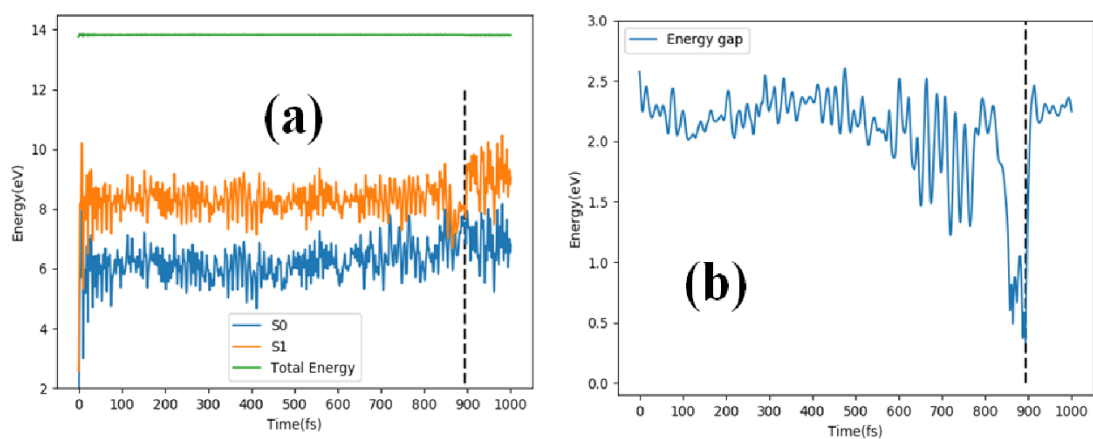

**Fig. S2** One hopping trajectory evolution starting from 11-cis Franck-Condon region on S<sub>1</sub> state up to 1000fs simulation (hop is taken place at 900fs). (a) Potential energy surfaces and (b) energy gap between S<sub>1</sub> and S<sub>0</sub> states.

a) CI(AT/7\_8-cis)  $\alpha$ :  $-179.86^\circ$

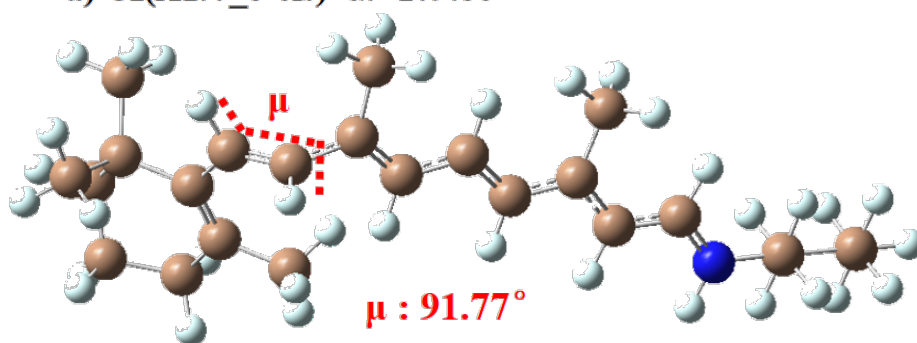

b) CI(AT/11-cis)

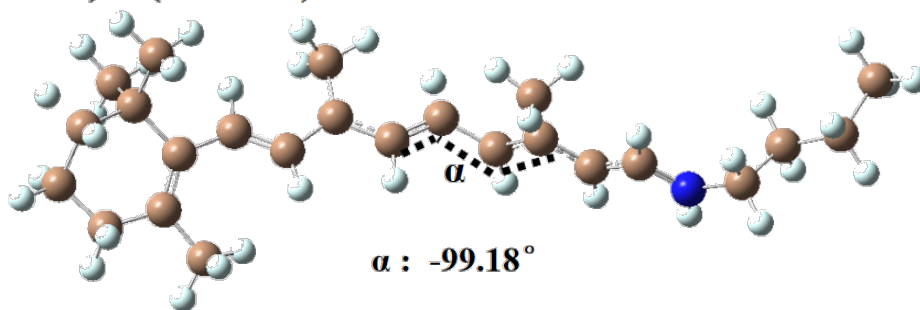

c) CI(AT/8\_11-cis)  $\alpha$ :  $-88.74^\circ$

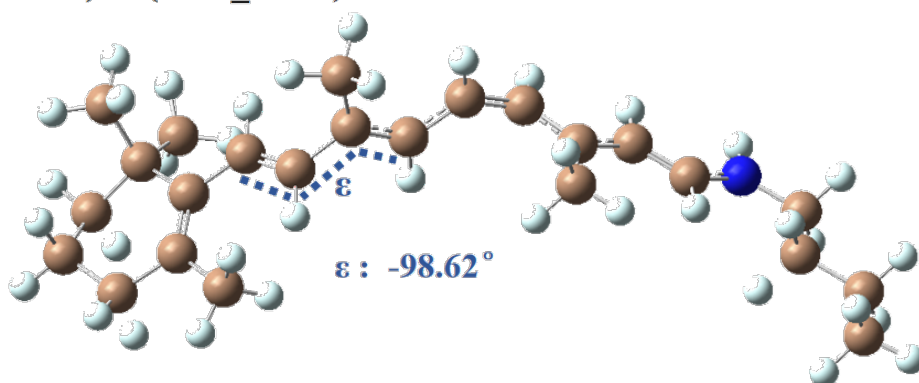

d) CI(AT/9\_11-cis)  $\alpha$ :  $-80.25^\circ$

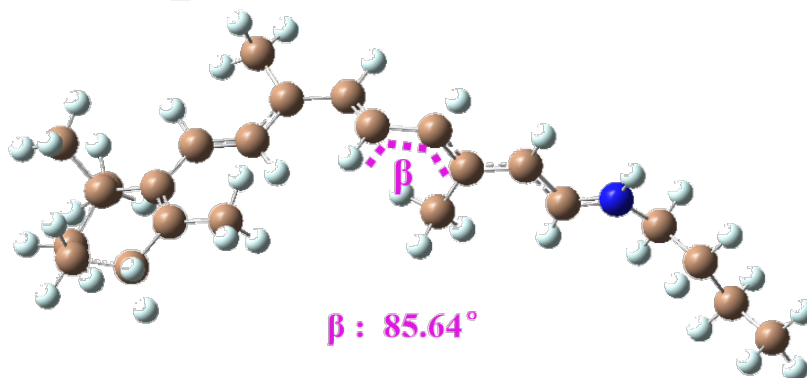

e) CI(11-cis/11\_14-cis)  $\alpha$ : 1.97°

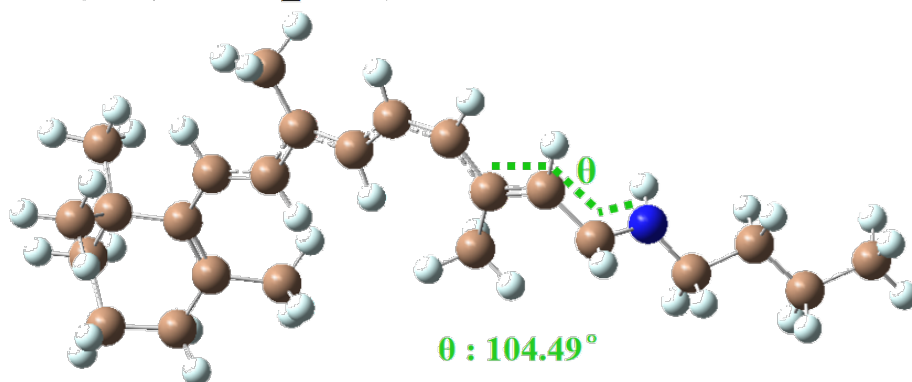

f) CI(11-cis/9\_11-cis)  $\alpha$ : 23.55°

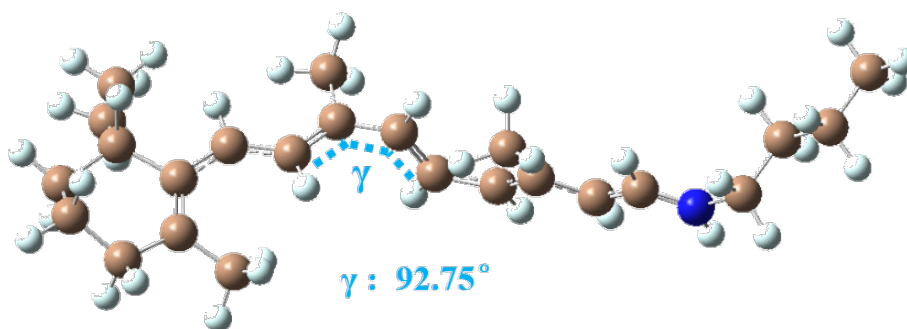

g) CI(AT/9-cis)  $\alpha$ : 178.61°

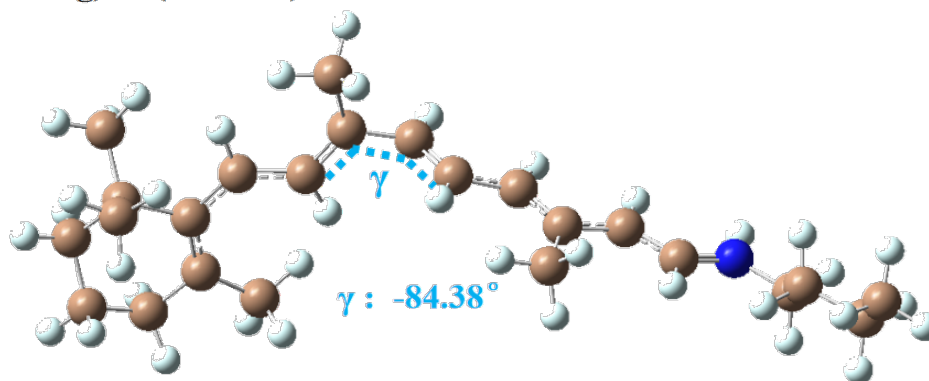

**Fig. S3** Conical intersection structures for (a) CI(all-trans/7\_8-cis), (b) CI(all-trans/11-cis), (c) CI(all-trans/8\_11-cis), (d) CI(all-trans/9\_11-cis), (e) CI(11-cis/11\_14-cis), (f) CI(11-cis/9\_11-cis), and (g) CI(all-trans/9-cis). The  $\alpha$  dihedral angle is shown for all seven CIs plus each CI has its own important dihedral angle. All seven dihedral angles are defined in Fig.1

a) CI(AT/7\_8-cis)  $\alpha$ :  $-179.86^\circ$

$\mu$ :  $91.77^\circ$

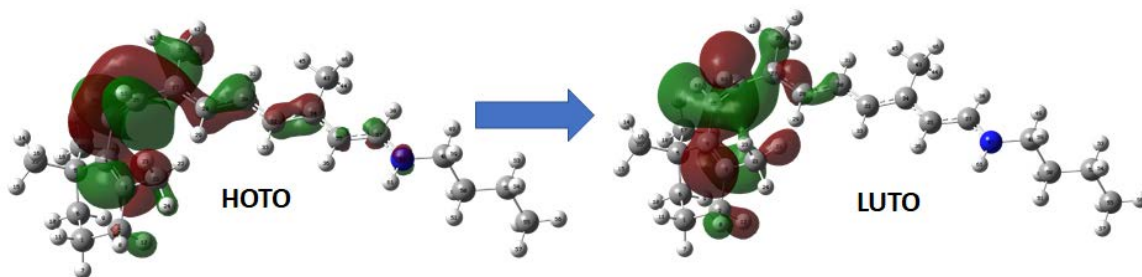

b) CI(AT/11-cis)  $\alpha$ :  $-99.18^\circ$

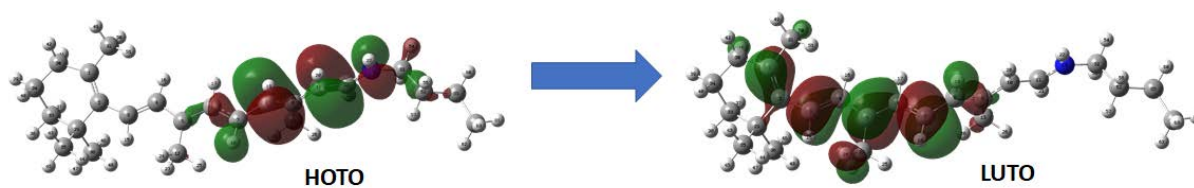

c) CI(AT/8\_11-cis)  $\alpha$ :  $-88.74^\circ$

$\epsilon$ :  $-98.62^\circ$

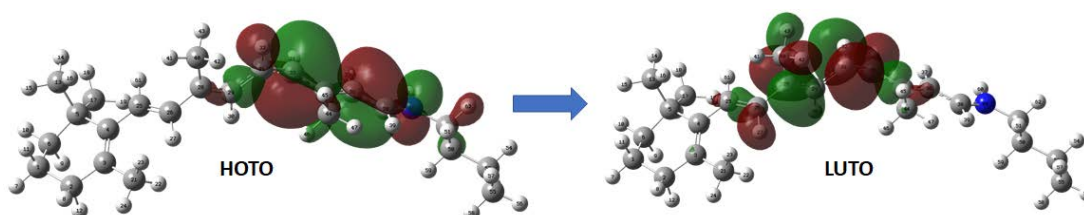

d) CI(AT/9\_11-cis)  $\alpha$ :  $-80.25^\circ$

$\beta$ :  $85.64^\circ$

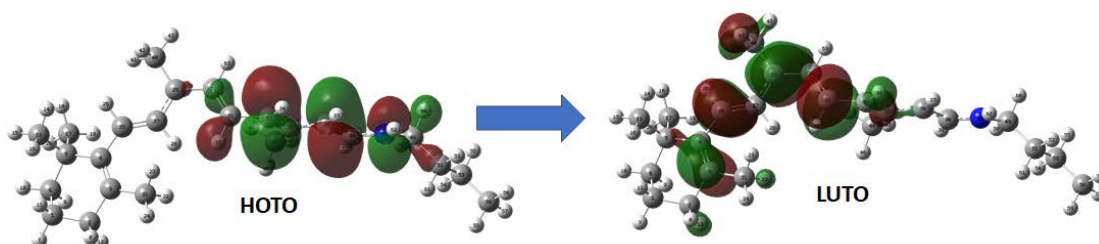

e) CI(11-cis/11\_14-cis)  $\alpha$ : 1.97°

$\theta$ : 104.49°

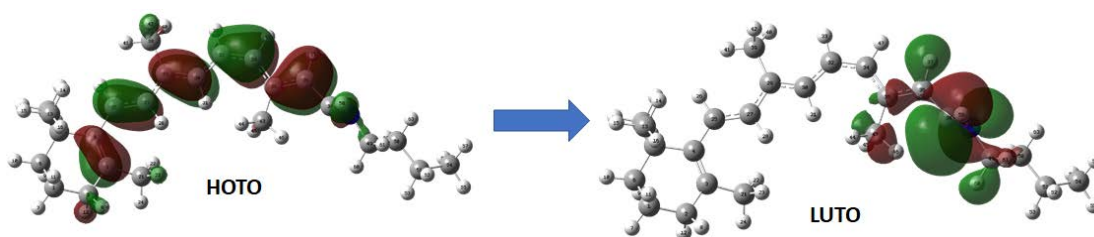

f) CI(11-cis/9\_11-cis)  $\alpha$ : 23.55°

$\gamma$ : 92.75°

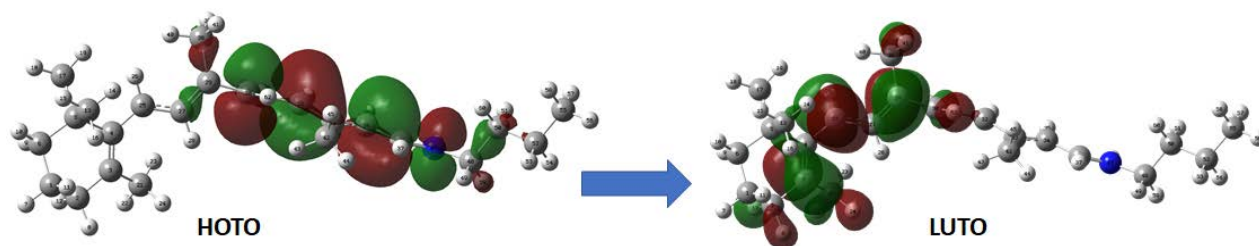

g) CI(AT/9-cis)  $\alpha$ : 178.61°

$\gamma$ : -84.38°

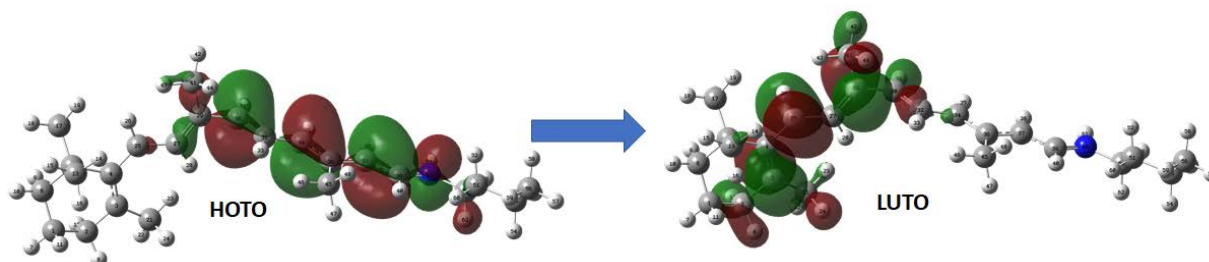

**Fig. S4** Calculated natural transition orbitals of  $S_0 \rightarrow S_1$  at representative conical intersections corresponding to dominant HOMO (HOTO) to LUMO (LUTO) transition with percentage contribution for (a) 86.4% at CI(all-trans/7\_8-cis), (b) 93.5% at CI(all-trans/11-cis), (c) 93.5% at CI(all-trans/8\_11-cis), (d) 94.5% at CI(all-trans/9\_11-cis), (e) 81.6% at CI(11-cis/11\_14-cis), (f) 94.8% at CI(11-cis/9\_11-cis), and (g) 94.8% at CI(all-trans/9-cis). The  $\alpha$  dihedral angle plus the other important dihedral angles are defined in Fig.S3.

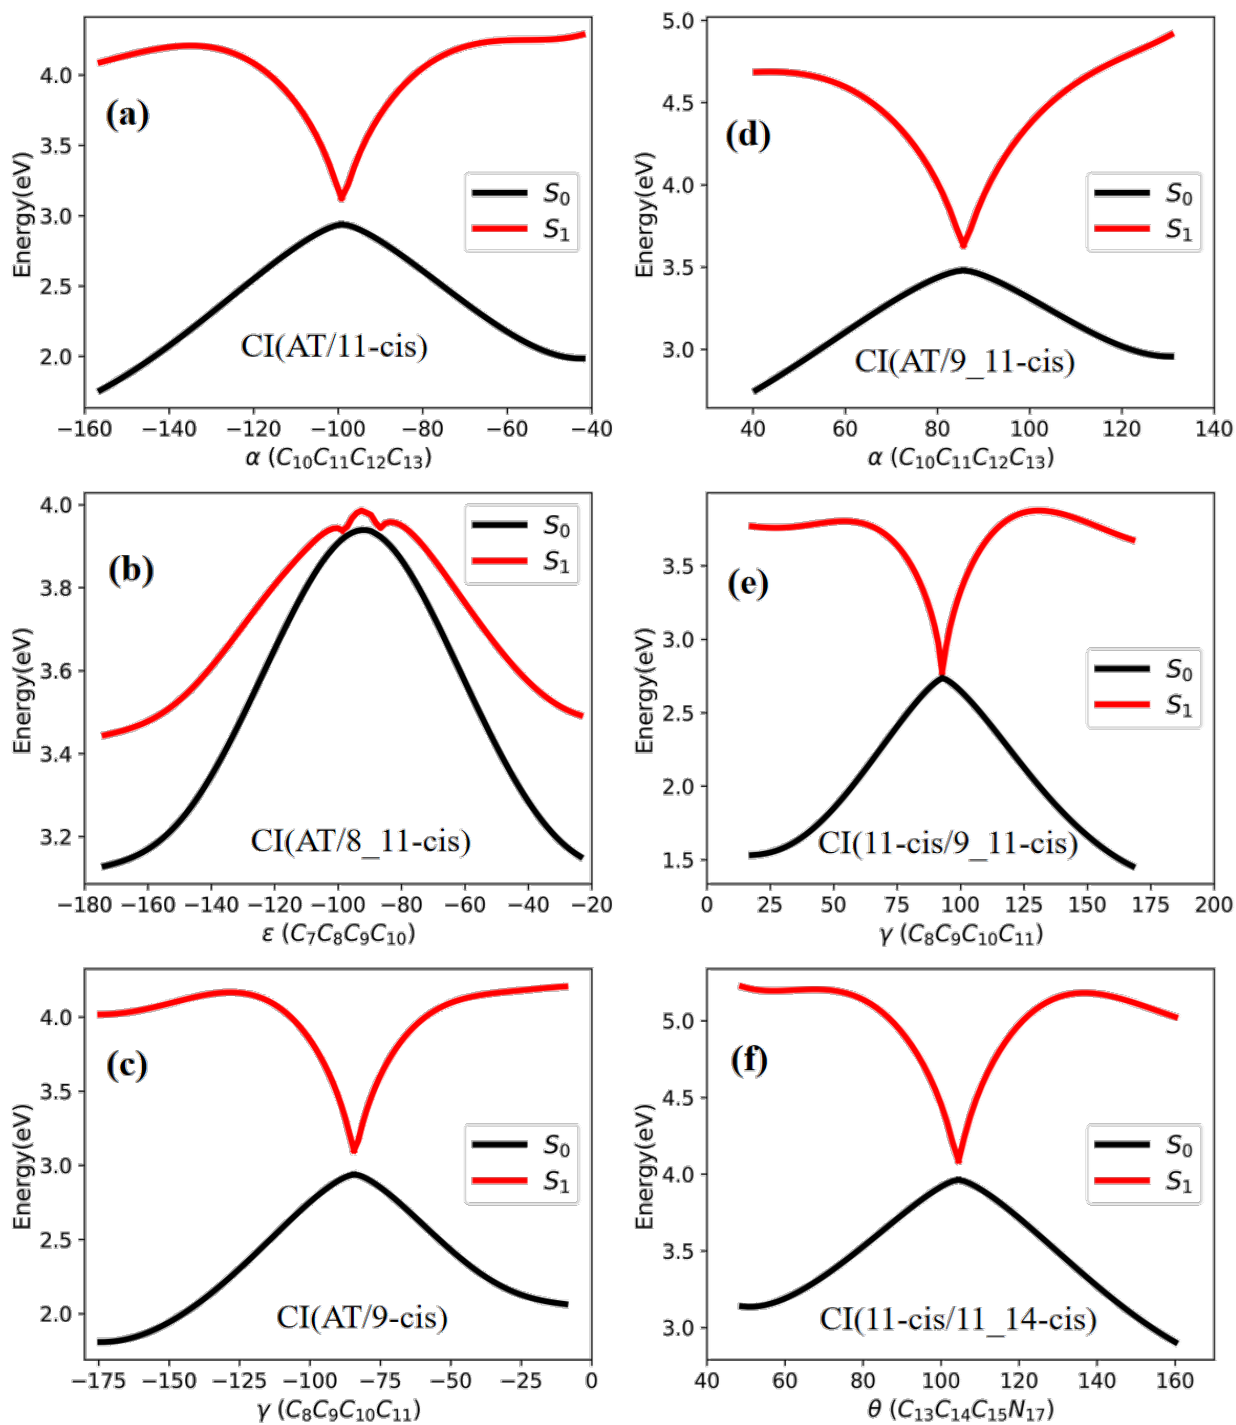

**Fig. S5** Scanned potential energy surfaces along minimum energy path for each conical intersection with respect to specific dihedral angle. (a) CI(all-trans/11-cis), (b) CI(all-trans/8\_11-cis), (c) CI(all-trans/9-cis), (d) CI(all-trans/9\_11-cis), (e) CI(11-cis/9\_11-cis), and (f) CI(11-cis/11\_14-cis).



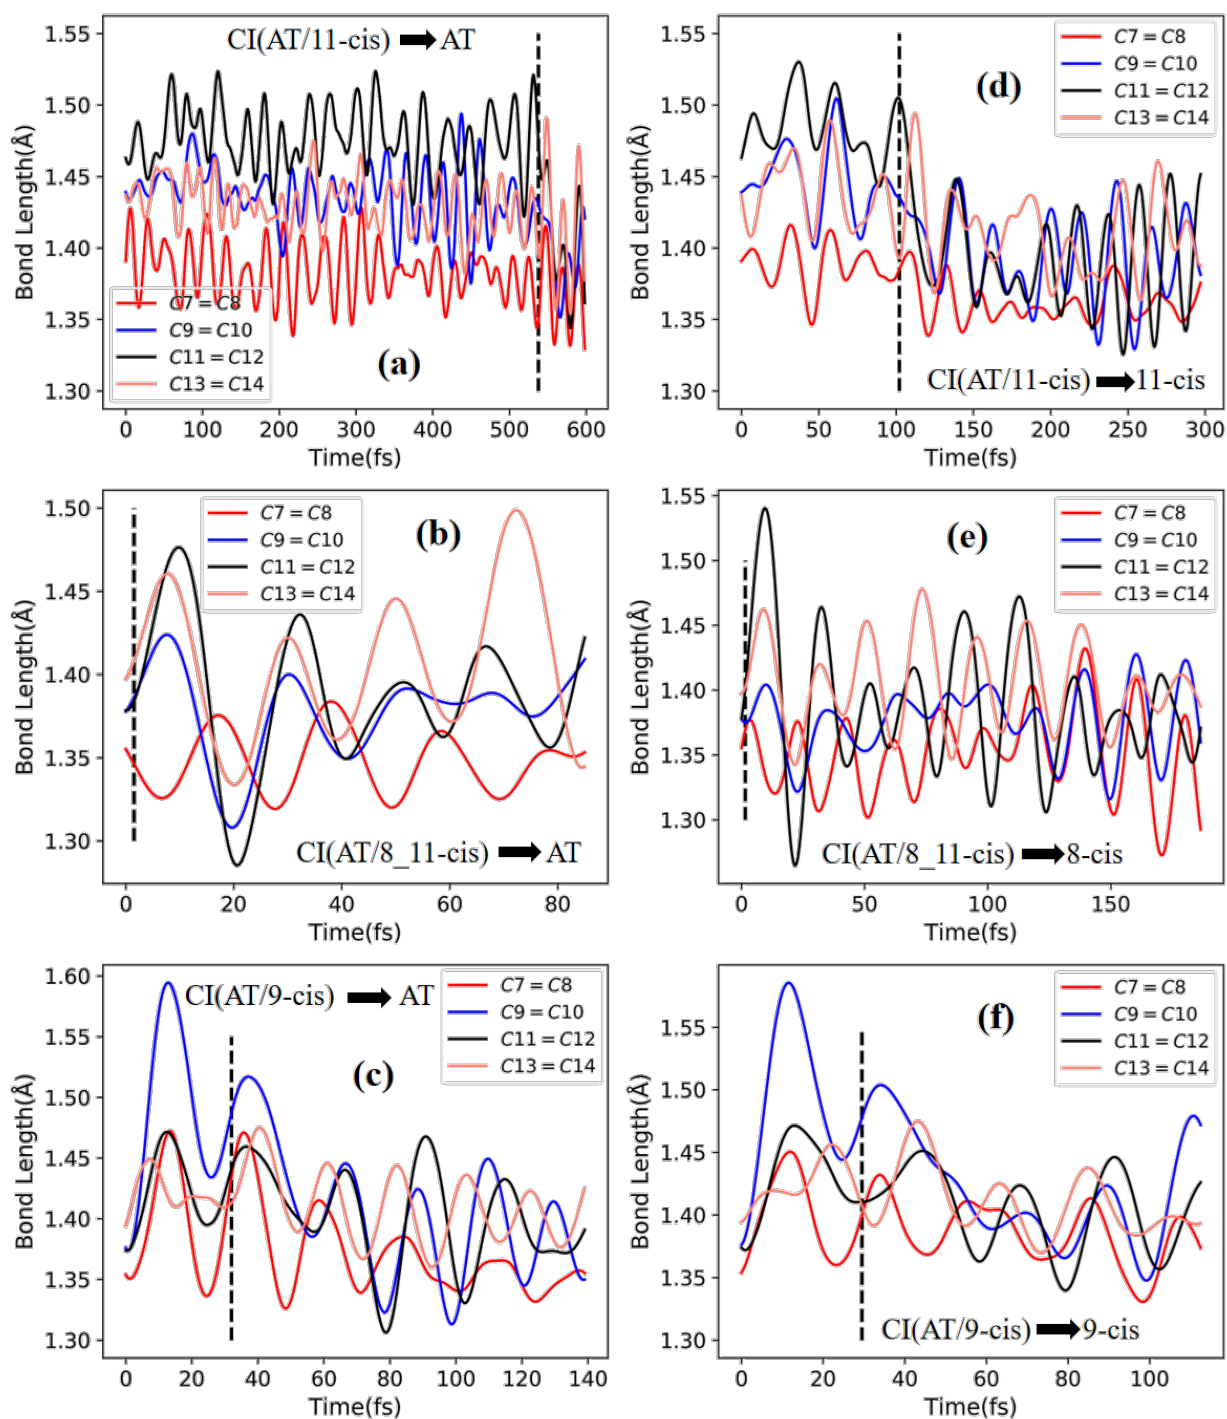

**Fig. S6** Four CC double bonds (C7=C8, C9=C10, C11=C12 and C13=C14) vary as function of time for typical trajectory corresponding to (a) Fig.5a, (b) Fig.5b, (c) Fig.5c, (d) Fig.6a, (e) Fig.6b, and Fig. 6c in the text. respectively.



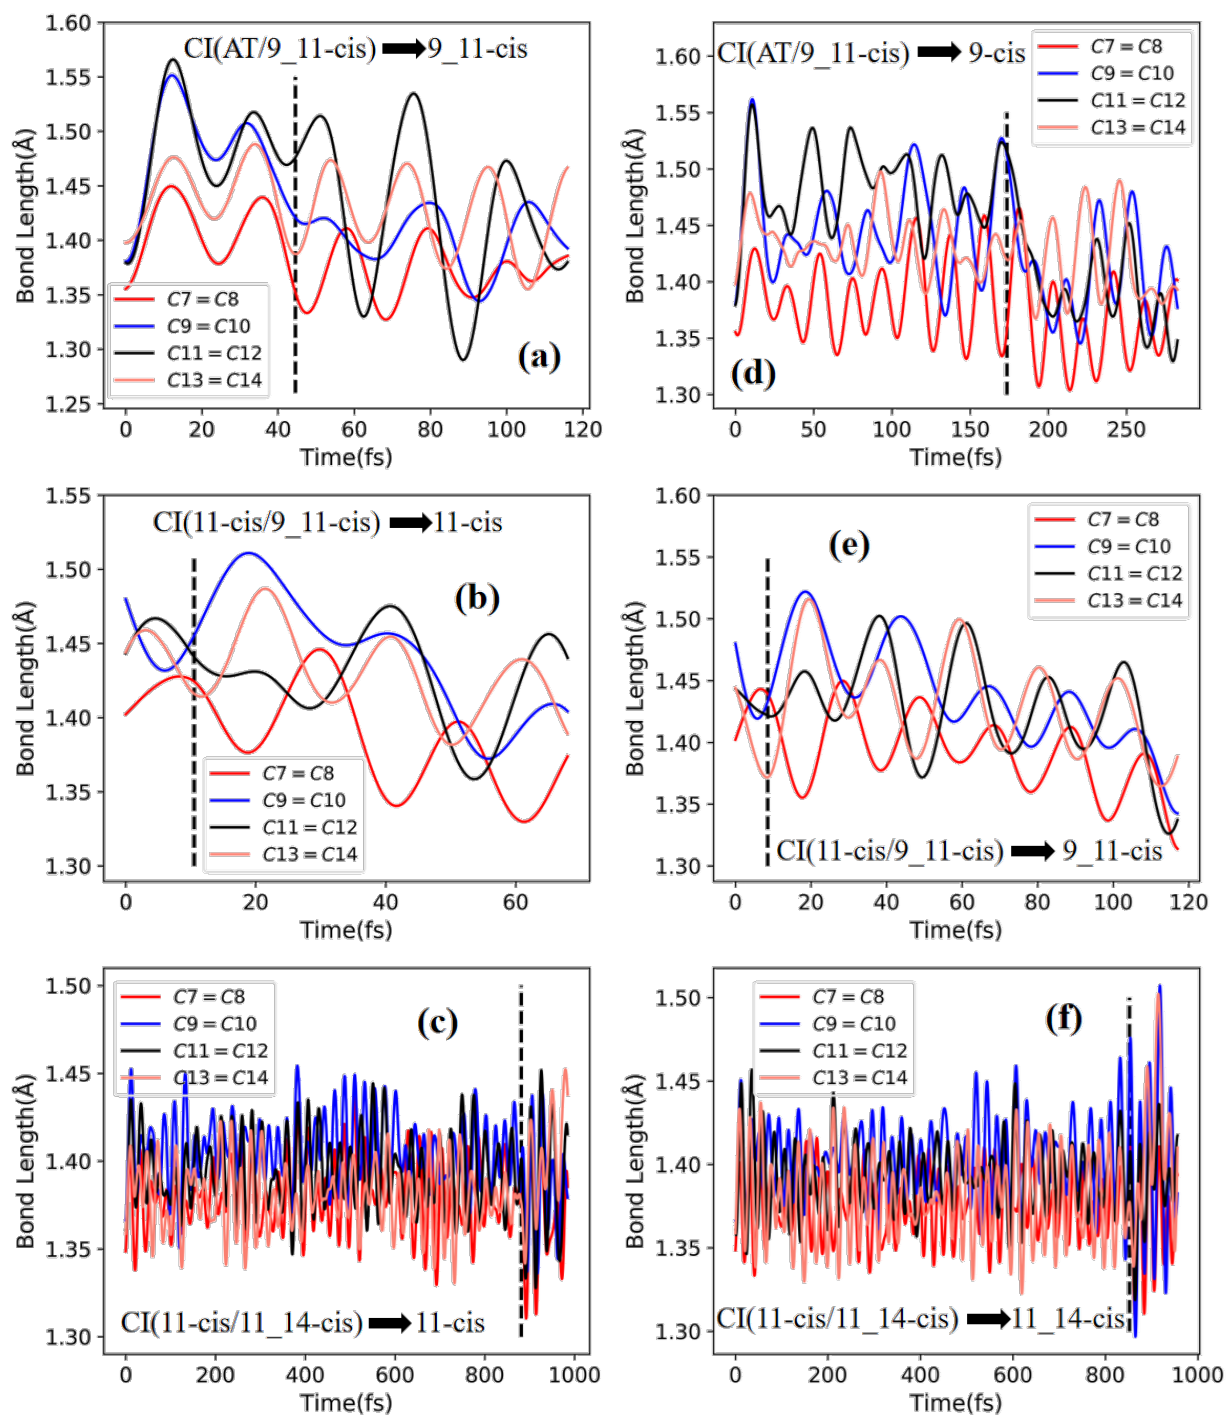

**Fig. S7** Four CC double bonds (C7=C8, C9=C10, C11=C12 and C13=C14) vary as function of time for typical trajectory corresponding to (a) Fig.7a, (b) Fig.7b, (c) Fig.7c, (d) Fig.8a, (e) Fig.8b, and Fig. 8c in the text, respectively.

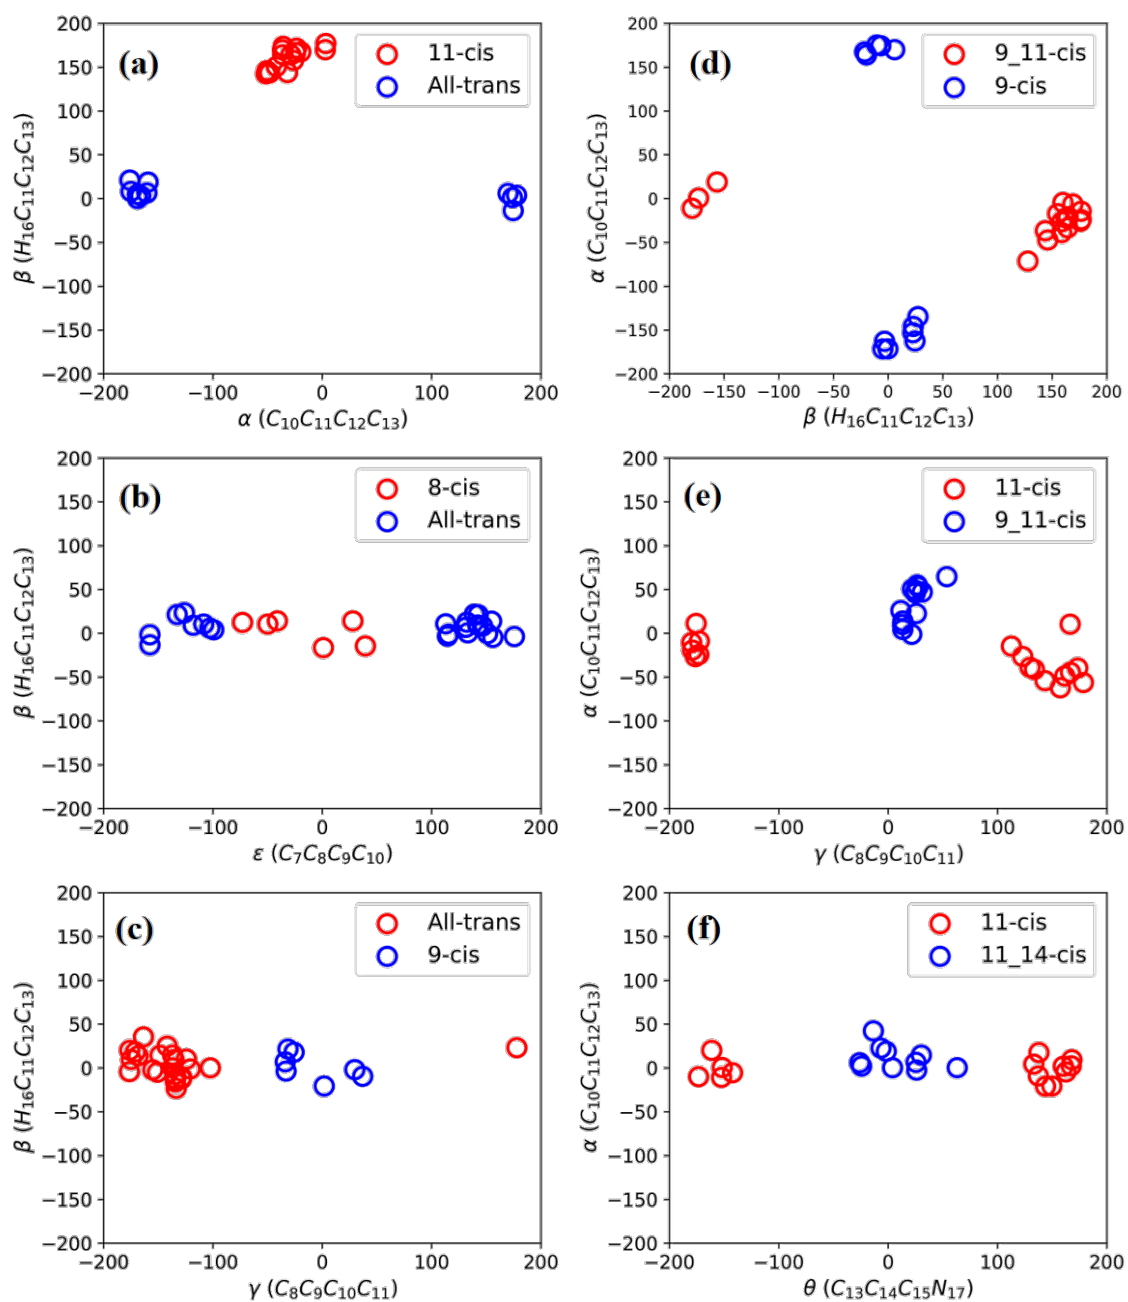

**Fig. S8** The distribution of final products on  $S_0$  state in terms of two characteristic dihedral angles for sampling trajectories corresponding to (a) Fig.3a, (b) Fig.3b, (c) Fig.3c, (d) Fig.3d, (e) Fig.3e, and (f) Fig.3f in the text, respectively.

**Table S1** Cartesian coordinates for ground state geometries listed in Table 1.**Table S1.1: All-trans**

|   |              |             |             |
|---|--------------|-------------|-------------|
| C | -9.37200100  | -2.86344100 | -1.53813700 |
| C | -7.98770800  | -2.77473500 | -0.90882500 |
| C | -7.54862000  | -1.37129200 | -0.56091900 |
| C | -8.16364500  | -0.27741600 | -1.06781300 |
| C | -9.39652500  | -0.35755600 | -1.98944200 |
| C | -9.53294900  | -1.77017800 | -2.58206400 |
| H | -9.51579500  | -3.85028200 | -1.98858200 |
| H | -7.93576600  | -3.39734300 | -0.00839700 |
| H | -8.76727100  | -1.90474000 | -3.35740900 |
| H | -10.50326900 | -1.84883900 | -3.08512200 |
| H | -10.13806200 | -2.76252700 | -0.76157300 |
| H | -7.23764700  | -3.19637900 | -1.59529600 |
| C | -10.66625000 | 0.00591100  | -1.19730700 |
| H | -10.60738600 | 1.01107700  | -0.76685000 |
| H | -11.53996100 | -0.01119900 | -1.85725300 |
| H | -10.84640600 | -0.69200700 | -0.37568300 |
| C | -9.24931700  | 0.62373000  | -3.16549400 |
| H | -10.08435800 | 0.49734500  | -3.86222800 |
| H | -9.25173200  | 1.66940600  | -2.84179800 |
| H | -8.32082800  | 0.44375900  | -3.71665800 |
| C | -6.38922900  | -1.33818800 | 0.40038200  |
| H | -5.44748900  | -1.57066100 | -0.11365200 |
| H | -6.26937100  | -0.37849200 | 0.90279600  |
| H | -6.51925700  | -2.10978600 | 1.16577500  |
| C | -7.75560700  | 1.08809400  | -0.73940500 |
| H | -8.57492400  | 1.79082400  | -0.60407500 |
| C | -6.49678300  | 1.57558100  | -0.66301100 |
| H | -5.66027800  | 0.91736500  | -0.87676800 |
| C | -6.15971200  | 2.94520700  | -0.35366100 |
| C | -4.83050900  | 3.29243100  | -0.35784200 |
| H | -4.11342200  | 2.50981600  | -0.59537900 |
| C | -4.29293900  | 4.57038400  | -0.08392800 |
| H | -4.97990200  | 5.37397500  | 0.16081600  |
| C | -2.94829200  | 4.84701100  | -0.11040300 |
| H | -2.26502800  | 4.03796400  | -0.35692200 |
| C | -2.37451100  | 6.11240600  | 0.16010100  |
| C | -0.98784500  | 6.22786700  | 0.09137500  |
| H | -0.42360200  | 5.33490300  | -0.16717400 |
| C | -0.26338500  | 7.39053400  | 0.32855100  |
| H | -0.76094900  | 8.31811400  | 0.59230500  |
| C | -7.26604200  | 3.91444500  | -0.04841100 |
| H | -7.95039400  | 3.98896800  | -0.89943600 |
| H | -7.85234900  | 3.56704300  | 0.80740100  |
| H | -6.91017000  | 4.91837700  | 0.17737000  |
| C | -3.26790500  | 7.27247100  | 0.50829700  |
| H | -3.97540500  | 7.46333700  | -0.30356200 |
| H | -3.85057800  | 7.04620800  | 1.40577300  |
| H | -2.72847400  | 8.19927100  | 0.69501400  |
| N | 1.05051600   | 7.47743900  | 0.26294200  |
| C | 1.84033600   | 8.68921500  | 0.48265100  |
| H | 1.15141000   | 9.47333100  | 0.80863100  |
| C | 2.60162200   | 9.11867600  | -0.76789300 |
| H | 3.24670100   | 8.29539900  | -1.10190500 |
| C | 3.45339100   | 10.36358600 | -0.51892100 |
| H | 2.80787200   | 11.18299300 | -0.17876500 |
| H | 4.15639900   | 10.16500100 | 0.29948200  |
| C | 4.22315100   | 10.80015100 | -1.76179400 |
| H | 4.82238900   | 11.69126500 | -1.55831300 |
| H | 4.90274500   | 10.01293300 | -2.10388300 |
| H | 3.54337300   | 11.03684800 | -2.58667000 |
| H | 2.53354900   | 8.50041600  | 1.30931700  |
| H | 1.88694400   | 9.30679900  | -1.57781300 |
| H | 1.56817400   | 6.64160000  | 0.01013900  |

Table S1.2: 7\_8-cis

|   |             |             |             |
|---|-------------|-------------|-------------|
| C | -2.52380200 | -1.99186000 | -2.70048500 |
| C | -3.38547300 | -1.25208900 | -1.68132200 |
| C | -3.34674300 | -1.86446100 | -0.29841000 |
| C | -2.87221500 | -3.11114200 | -0.06708300 |
| C | -2.39254000 | -4.05421700 | -1.19548900 |
| C | -2.77642600 | -3.49172200 | -2.58093100 |
| H | -2.75085200 | -1.64341400 | -3.71299900 |
| H | -3.08050200 | -0.19966800 | -1.60552600 |
| H | -3.84289300 | -3.68427400 | -2.75863400 |
| H | -2.22381900 | -4.04605100 | -3.34791400 |
| H | -1.46316600 | -1.77259600 | -2.52399700 |
| H | -4.43099500 | -1.22855200 | -2.02318000 |
| C | -0.85956000 | -4.21879200 | -1.09444400 |
| H | -0.50812900 | -4.95031000 | -1.82964000 |
| H | -0.33936200 | -3.27412700 | -1.28146100 |
| H | -0.56855700 | -4.57338400 | -0.10022700 |
| C | -3.03853600 | -5.45175100 | -1.06875100 |
| H | -2.80292300 | -6.03975000 | -1.96126700 |
| H | -2.66261500 | -6.00907600 | -0.20627500 |
| H | -4.12848900 | -5.38090900 | -0.99269200 |
| C | -3.91275300 | -0.96193600 | 0.76496400  |
| H | -4.14915000 | -1.48595700 | 1.69102600  |
| H | -3.20720800 | -0.15532800 | 1.00472200  |
| H | -4.82724600 | -0.48259900 | 0.39857300  |
| C | -2.86787000 | -3.71978800 | 1.27625500  |
| H | -3.40458500 | -4.66507700 | 1.32876700  |
| C | -2.31541000 | -3.33293900 | 2.45170400  |
| H | -2.54329300 | -3.97048200 | 3.30305400  |
| C | -1.43248200 | -2.22359200 | 2.79054800  |
| C | -0.77049400 | -1.47272500 | 1.85063600  |
| H | -0.93393200 | -1.71314200 | 0.80668300  |
| C | 0.12634100  | -0.40965000 | 2.12242300  |
| H | 0.28650800  | -0.12331800 | 3.15666400  |
| C | 0.80162400  | 0.27703100  | 1.14068700  |
| H | 0.63771000  | -0.01727100 | 0.10778100  |
| C | 1.71034200  | 1.34280900  | 1.36846000  |
| C | 2.32526400  | 1.92989400  | 0.26061200  |
| H | 2.06834300  | 1.53276400  | -0.71769900 |
| C | 3.24219800  | 2.97510300  | 0.30524900  |
| H | 3.54150300  | 3.41461500  | 1.25017500  |
| C | -1.26566500 | -2.02654800 | 4.27482600  |
| H | -0.61079600 | -1.20100000 | 4.54704800  |
| H | -2.24171500 | -1.85160100 | 4.74019100  |
| H | -0.86115800 | -2.93810600 | 4.72903800  |
| C | 1.98338400  | 1.79630700  | 2.77931800  |
| H | 2.66915300  | 2.63890400  | 2.84031400  |
| H | 1.05452900  | 2.09774300  | 3.27162800  |
| H | 2.41603500  | 0.98042300  | 3.36593300  |
| N | 3.81870800  | 3.51142800  | -0.76171100 |
| C | 4.77455100  | 4.62978200  | -0.73933000 |
| H | 4.99713900  | 4.85432800  | 0.30778200  |
| C | 4.23397300  | 5.87029400  | -1.45260600 |
| H | 3.97227000  | 5.61390100  | -2.48804800 |
| C | 5.25293400  | 7.01658700  | -1.45674400 |
| H | 5.51870500  | 7.27096800  | -0.42243800 |
| H | 6.17834600  | 6.67944800  | -1.94121700 |
| C | 4.72413100  | 8.26184500  | -2.17092800 |
| H | 5.46562900  | 9.06470900  | -2.16047800 |
| H | 4.48258300  | 8.04502900  | -3.21665100 |
| H | 3.81681800  | 8.63943500  | -1.68818100 |
| H | 5.70702100  | 4.29702400  | -1.20750400 |
| H | 3.30800800  | 6.19574900  | -0.96322600 |
| H | 3.57720300  | 3.14801500  | -1.67717900 |

Table S1.3: **8\_11-cis**

|   |             |             |             |
|---|-------------|-------------|-------------|
| C | -5.09899000 | -4.00267200 | -2.21874200 |
| C | -4.13592500 | -4.89730300 | -1.44669300 |
| C | -3.24545600 | -4.14497800 | -0.48527500 |
| C | -3.09115900 | -2.79422600 | -0.53946300 |
| C | -3.72678000 | -1.92504600 | -1.65022600 |
| C | -4.33249600 | -2.80393900 | -2.76630000 |
| H | -5.56802200 | -4.56504600 | -3.03185400 |
| H | -4.68357900 | -5.66216300 | -0.88072000 |
| H | -3.52227600 | -3.16930600 | -3.41213400 |
| H | -4.97608200 | -2.17629200 | -3.39259900 |
| H | -5.90906300 | -3.66823800 | -1.56016700 |
| H | -3.49716800 | -5.45582200 | -2.14814300 |
| C | -4.82355900 | -1.03270700 | -1.02910300 |
| H | -5.24696000 | -0.36636300 | -1.78800900 |
| H | -5.63600000 | -1.63147700 | -0.60804100 |
| H | -4.41735400 | -0.41206000 | -0.22322700 |
| C | -2.66926400 | -1.01537300 | -2.31675300 |
| H | -2.33329400 | -0.20541100 | -1.66209000 |
| H | -1.79694100 | -1.59359000 | -2.63863400 |
| H | -3.10698900 | -0.54513800 | -3.20300400 |
| C | -2.53474500 | -5.05884100 | 0.47999700  |
| H | -1.62449400 | -4.62559500 | 0.89542900  |
| H | -3.18752000 | -5.34003900 | 1.31643800  |
| H | -2.27007100 | -5.99131500 | -0.02996400 |
| C | -2.31065300 | -2.05035400 | 0.44498100  |
| H | -1.82962600 | -1.15069700 | 0.07084300  |
| C | -2.20164800 | -2.30184900 | 1.77524100  |
| H | -2.79592400 | -3.09778400 | 2.20987200  |
| C | -1.42185100 | -1.51891000 | 2.71396300  |
| C | -0.38022900 | -0.71432700 | 2.29419400  |
| H | -0.12613000 | -0.76127400 | 1.24660700  |
| C | 0.36100700  | 0.13779600  | 3.14652200  |
| H | 0.05392000  | 0.12953100  | 4.18800500  |
| C | 1.41464600  | 0.99988700  | 2.90039300  |
| H | 1.77349700  | 1.53590100  | 3.77373200  |
| C | 2.11258400  | 1.30352500  | 1.70310700  |
| C | 3.14978000  | 2.24075700  | 1.79441400  |
| H | 3.34150900  | 2.67015200  | 2.77392400  |
| C | 3.95556200  | 2.66683400  | 0.74649700  |
| H | 3.82192600  | 2.27896500  | -0.25713000 |
| C | -1.84215600 | -1.66689700 | 4.15143600  |
| H | -1.98014300 | -2.72616300 | 4.38937300  |
| H | -1.13494300 | -1.25701900 | 4.87000000  |
| H | -2.81188600 | -1.18134900 | 4.31173600  |
| C | 1.75701500  | 0.64436400  | 0.40034700  |
| H | 1.85277700  | -0.44197900 | 0.48413000  |
| H | 0.71899800  | 0.86329700  | 0.13254600  |
| H | 2.38193300  | 0.96369900  | -0.43150600 |
| N | 4.93423900  | 3.55621700  | 0.86852800  |
| C | 5.78732100  | 4.03611700  | -0.22887100 |
| H | 6.83077100  | 3.81542200  | 0.02058400  |
| C | 5.60933800  | 5.53238700  | -0.49241900 |
| H | 4.56320700  | 5.73290200  | -0.75367700 |
| C | 6.53193200  | 6.02998000  | -1.61187200 |
| H | 7.57526800  | 5.81746000  | -1.34520900 |
| H | 6.32549600  | 5.46635600  | -2.53109500 |
| C | 6.36581000  | 7.52686000  | -1.88041600 |
| H | 7.03135400  | 7.85830500  | -2.68154000 |
| H | 5.33953200  | 7.76350800  | -2.17980900 |
| H | 6.59927600  | 8.11658600  | -0.98789400 |
| H | 5.53627100  | 3.45615300  | -1.12173900 |
| H | 5.81942000  | 6.09453400  | 0.42748100  |
| H | 5.10789700  | 3.96264100  | 1.78106400  |

Table S1.4: **9\_11-cis**

|   |             |             |             |
|---|-------------|-------------|-------------|
| C | -7.02185500 | -2.42257100 | -1.79077400 |
| C | -5.62320500 | -3.01985200 | -1.93052700 |
| C | -4.59836200 | -2.43733500 | -0.98042100 |
| C | -4.80693100 | -1.27265000 | -0.31255900 |
| C | -6.12267700 | -0.46789500 | -0.41848200 |
| C | -6.92461100 | -0.90688000 | -1.66161600 |
| H | -7.63355600 | -2.69623700 | -2.65606600 |
| H | -5.65811800 | -4.10665400 | -1.79133300 |
| H | -6.43639100 | -0.50253100 | -2.55865000 |
| H | -7.92074200 | -0.45275000 | -1.61321100 |
| H | -7.51992000 | -2.84624800 | -0.91136700 |
| H | -5.25553100 | -2.86740300 | -2.95761300 |
| C | -6.97043900 | -0.67861200 | 0.85599500  |
| H | -6.43332800 | -0.36948700 | 1.75884700  |
| H | -7.88506400 | -0.07921700 | 0.79982900  |
| H | -7.25416500 | -1.72648000 | 0.98196300  |
| C | -5.81852600 | 1.03797700  | -0.57240100 |
| H | -5.34127900 | 1.45994600  | 0.31749100  |
| H | -5.16255200 | 1.21943300  | -1.42964400 |
| H | -6.75085300 | 1.58800400  | -0.73614200 |
| C | -3.36072600 | -3.29103000 | -0.85012600 |
| H | -2.67680000 | -3.12833100 | -1.69396700 |
| H | -2.80683000 | -3.10703600 | 0.07081400  |
| H | -3.63467400 | -4.35002700 | -0.87500700 |
| C | -3.83875500 | -0.69938500 | 0.62096500  |
| H | -4.27929800 | -0.22649400 | 1.49512600  |
| C | -2.49046800 | -0.63676100 | 0.48358300  |
| H | -2.05274400 | -1.02857900 | -0.42474600 |
| C | -1.60646300 | -0.03820100 | 1.45689200  |
| C | -0.23713700 | 0.06530800  | 1.28879700  |
| H | 0.30240500  | 0.53427500  | 2.09742600  |
| C | 0.48043800  | -0.39159700 | 0.15551000  |
| H | -0.12156100 | -0.85529300 | -0.62029600 |
| C | 1.82638100  | -0.35815000 | -0.15604100 |
| C | 2.94040200  | 0.15140900  | 0.56352700  |
| C | 4.19570000  | 0.02556100  | -0.04271400 |
| H | 4.22800300  | -0.45212300 | -1.01807700 |
| C | 5.40374500  | 0.45535700  | 0.49371700  |
| H | 5.44582000  | 0.93890600  | 1.46320900  |
| C | -2.19601300 | 0.50760300  | 2.73132700  |
| H | -2.72184000 | -0.27285800 | 3.29005300  |
| H | -1.42401900 | 0.92444600  | 3.37919400  |
| H | -2.92195300 | 1.30027400  | 2.52167900  |
| C | 2.77491600  | 0.79435400  | 1.91124000  |
| H | 3.71110900  | 1.14202100  | 2.34375100  |
| H | 2.10555800  | 1.65676300  | 1.84255800  |
| H | 2.32948200  | 0.08853600  | 2.61835600  |
| N | 6.57961200  | 0.31772500  | -0.10598700 |
| C | 7.86725300  | 0.78156200  | 0.43277400  |
| H | 7.68761200  | 1.15498200  | 1.44509200  |
| C | 8.50368600  | 1.86794700  | -0.43594100 |
| H | 8.63330800  | 1.49072300  | -1.45929400 |
| C | 9.86302900  | 2.31662800  | 0.11446400  |
| H | 9.73542600  | 2.69052600  | 1.13872500  |
| H | 10.53279800 | 1.44961500  | 0.18166000  |
| C | 10.51140100 | 3.40001300  | -0.74940100 |
| H | 11.47705300 | 3.70451200  | -0.33785700 |
| H | 10.68212400 | 3.04196600  | -1.76996500 |
| H | 9.87776800  | 4.29103600  | -0.80804300 |
| H | 8.53814500  | -0.08007000 | 0.51697700  |
| H | 7.82435900  | 2.72665200  | -0.49883100 |
| H | 6.60895900  | -0.12149100 | -1.01949400 |
| H | 2.08014900  | -0.79594600 | -1.11669800 |

Table S1.5: 11-cis

|   |              |             |             |
|---|--------------|-------------|-------------|
| C | -10.30725300 | -2.77289500 | -1.36216900 |
| C | -8.87453100  | -3.02944200 | -0.91295700 |
| C | -8.08914500  | -1.78023500 | -0.58707500 |
| C | -8.49450500  | -0.55084800 | -0.98171100 |
| C | -9.81433000  | -0.30330400 | -1.73855400 |
| C | -10.33789400 | -1.61517700 | -2.34693300 |
| H | -10.72421600 | -3.67658800 | -1.81698400 |
| H | -8.85942000  | -3.69642700 | -0.04345100 |
| H | -9.72067400  | -1.87342800 | -3.21753000 |
| H | -11.35334200 | -1.44814900 | -2.72326000 |
| H | -10.93256100 | -2.54728000 | -0.49150600 |
| H | -8.32721800  | -3.56925800 | -1.70083400 |
| C | -10.86396200 | 0.28829000  | -0.77934700 |
| H | -10.52758100 | 1.23007700  | -0.33334400 |
| H | -11.79126200 | 0.50189500  | -1.32117000 |
| H | -11.09814100 | -0.39654000 | 0.03963400  |
| C | -9.58906000  | 0.68510300  | -2.89603400 |
| H | -10.50822300 | 0.78777500  | -3.48186500 |
| H | -9.31390500  | 1.68501500  | -2.54584500 |
| H | -8.79934900  | 0.33399300  | -3.56792800 |
| C | -6.84782200  | -2.05891000 | 0.21977700  |
| H | -6.05447200  | -2.47606600 | -0.41421400 |
| H | -6.44932800  | -1.17743200 | 0.72171600  |
| H | -7.06203500  | -2.81637200 | 0.98038700  |
| C | -7.75017100  | 0.66941400  | -0.67189600 |
| H | -8.36558800  | 1.52694600  | -0.40926400 |
| C | -6.41394400  | 0.86063100  | -0.75097700 |
| H | -5.78448100  | 0.04480200  | -1.09352500 |
| C | -5.73650400  | 2.10139000  | -0.45329200 |
| C | -4.37204400  | 2.13757500  | -0.63610200 |
| H | -3.92068900  | 1.22129400  | -0.99092600 |
| C | -3.54933200  | 3.26401000  | -0.39543800 |
| H | -4.06676000  | 4.14512200  | -0.02883000 |
| C | -2.19199900  | 3.46341700  | -0.53686400 |
| C | -1.16116600  | 2.59750100  | -0.98480600 |
| C | 0.13170900   | 3.12093300  | -1.00793000 |
| H | 0.25985400   | 4.15072600  | -0.68338100 |
| C | 1.27462800   | 2.44048800  | -1.41163900 |
| H | 1.22799500   | 1.41022200  | -1.74903100 |
| C | -6.55249200  | 3.26695000  | 0.02792000  |
| H | -7.30026200  | 3.53894200  | -0.72376000 |
| H | -7.09423700  | 2.99964800  | 0.93987100  |
| H | -5.96258400  | 4.15608300  | 0.24080100  |
| C | -1.45456100  | 1.18957600  | -1.41277900 |
| H | -1.89953500  | 0.62891200  | -0.58573100 |
| H | -2.17374600  | 1.18811000  | -2.23666000 |
| H | -0.57385100  | 0.64222300  | -1.74468800 |
| N | 2.48536800   | 2.96265400  | -1.42683200 |
| C | 3.71206800   | 2.26933600  | -1.82015700 |
| H | 3.42447400   | 1.28158100  | -2.19082600 |
| C | 4.70450500   | 2.15061800  | -0.66737600 |
| H | 4.93657900   | 3.15237200  | -0.28256800 |
| C | 5.99829600   | 1.45796400  | -1.09581900 |
| H | 5.76362700   | 0.45961700  | -1.48581700 |
| H | 6.45068500   | 2.01457100  | -1.92585500 |
| C | 7.00067500   | 1.33837800  | 0.04821100  |
| H | 7.91500400   | 0.83938800  | -0.28283100 |
| H | 7.28040600   | 2.32378400  | 0.43459300  |
| H | 6.58669100   | 0.75849400  | 0.87942100  |
| H | 4.15940100   | 2.81422300  | -2.65836100 |
| H | 4.23601700   | 1.59826500  | 0.15576900  |
| H | 2.59108500   | 3.92188000  | -1.11179500 |
| H | -1.85069700  | 4.45676700  | -0.25981700 |



Table S1.6: **11\_14-cis**

|   |             |             |             |
|---|-------------|-------------|-------------|
| C | -5.64286100 | -4.03301600 | -0.16229600 |
| C | -4.22055900 | -4.03416700 | 0.39380500  |
| C | -3.62981400 | -2.65587200 | 0.60056700  |
| C | -4.16750900 | -1.54273000 | 0.03449200  |
| C | -5.45330700 | -1.57557000 | -0.82368100 |
| C | -5.75359600 | -3.01515100 | -1.29136900 |
| H | -5.90554000 | -5.03363100 | -0.51937700 |
| H | -4.18341800 | -4.58151600 | 1.34284300  |
| H | -5.04459800 | -3.28446600 | -2.08596400 |
| H | -6.75279500 | -3.03513900 | -1.74076100 |
| H | -6.35324500 | -3.79150600 | 0.63638900  |
| H | -3.55560800 | -4.58634600 | -0.28919700 |
| C | -6.64444300 | -1.02922200 | -0.00512300 |
| H | -6.84185000 | -1.64316300 | 0.87718000  |
| H | -6.46835800 | -0.00396900 | 0.33700300  |
| H | -7.54794200 | -1.01553000 | -0.62349200 |
| C | -5.27600600 | -0.70710900 | -2.08798500 |
| H | -6.15543800 | -0.80914900 | -2.73195700 |
| H | -5.16489100 | 0.35571200  | -1.85195300 |
| H | -4.39809100 | -1.02321000 | -2.66025000 |
| C | -2.41912000 | -2.65932700 | 1.50099300  |
| H | -1.51375800 | -2.94021500 | 0.94645800  |
| H | -2.23432400 | -1.69475300 | 1.97479700  |
| H | -2.54331900 | -3.40690300 | 2.28993700  |
| C | -3.62661800 | -0.20121600 | 0.23533300  |
| H | -4.37747600 | 0.58299500  | 0.29569200  |
| C | -2.32385100 | 0.17691300  | 0.28599400  |
| H | -1.54911100 | -0.56686500 | 0.13529700  |
| C | -1.86669000 | 1.53323900  | 0.48165800  |
| C | -0.50501500 | 1.76707800  | 0.42957300  |
| H | 0.11729000  | 0.90013200  | 0.24750700  |
| C | 0.11869800  | 3.01653000  | 0.65717100  |
| H | -0.53473800 | 3.81220900  | 1.00239400  |
| C | 1.44861300  | 3.39115600  | 0.58534000  |
| C | 2.57794200  | 2.70050000  | 0.07686400  |
| C | 3.83408000  | 3.27780900  | 0.30905200  |
| H | 3.83423300  | 4.23479200  | 0.81758100  |
| C | 5.11065200  | 2.80999500  | -0.00126400 |
| H | 5.93311600  | 3.48751600  | 0.21089400  |
| C | -2.88631200 | 2.61332700  | 0.71677700  |
| H | -3.54675400 | 2.70709000  | -0.15183500 |
| H | -3.51590200 | 2.36802200  | 1.57675600  |
| H | -2.44700500 | 3.59285400  | 0.89286600  |
| C | 2.43374200  | 1.45598900  | -0.75760600 |
| H | 2.56698900  | 0.54548000  | -0.15822600 |
| H | 1.45043900  | 1.40127900  | -1.22111000 |
| H | 3.16258300  | 1.44656100  | -1.57277400 |
| N | 5.50333400  | 1.63891400  | -0.49588200 |
| C | 6.90823200  | 1.27983100  | -0.75435900 |
| H | 7.01219200  | 1.02521200  | -1.81455400 |
| C | 7.37908600  | 0.11780100  | 0.12130300  |
| H | 7.28044000  | 0.39638700  | 1.17744900  |
| C | 8.83046300  | -0.27523100 | -0.18087000 |
| H | 8.92197300  | -0.54372400 | -1.24124300 |
| H | 9.48237000  | 0.59368200  | -0.02329400 |
| C | 9.31069200  | -1.43986300 | 0.68704100  |
| H | 10.34644900 | -1.70079600 | 0.45541400  |
| H | 9.26061400  | -1.18691600 | 1.75114200  |
| H | 8.69792000  | -2.33281100 | 0.52491000  |
| H | 7.51628700  | 2.17042200  | -0.57285600 |
| H | 6.72736000  | -0.75201800 | -0.03979400 |
| H | 4.82573200  | 0.90891900  | -0.66359500 |
| H | 1.66855200  | 4.37500400  | 0.98876400  |

Table S1.7: 9-cis

|   |             |             |             |
|---|-------------|-------------|-------------|
| C | -3.92342300 | -5.96214600 | 0.60419700  |
| C | -2.75744200 | -5.80210300 | -0.36538100 |
| C | -2.48860600 | -4.36723500 | -0.75829300 |
| C | -3.38342000 | -3.37058800 | -0.53410700 |
| C | -4.79447800 | -3.62662100 | 0.04532600  |
| C | -5.10428400 | -5.13830100 | 0.10217300  |
| H | -4.19934100 | -7.01742700 | 0.69323800  |
| H | -1.83672800 | -6.22208800 | 0.06122500  |
| H | -5.37289100 | -5.48485500 | -0.90497800 |
| H | -5.98720600 | -5.28897000 | 0.73315200  |
| H | -3.62621500 | -5.62925200 | 1.60574200  |
| H | -2.94757000 | -6.38487700 | -1.27969400 |
| C | -4.87708000 | -3.01777200 | 1.46233000  |
| H | -4.64208300 | -1.94822900 | 1.44560500  |
| H | -5.88776700 | -3.13455800 | 1.86716300  |
| H | -4.17559700 | -3.50144800 | 2.14823900  |
| C | -5.88227400 | -2.97250700 | -0.83673600 |
| H | -6.86780500 | -3.31382100 | -0.50475000 |
| H | -5.88505300 | -1.88085600 | -0.76706200 |
| H | -5.76475400 | -3.25647700 | -1.88741700 |
| C | -1.16673500 | -4.19906200 | -1.46589200 |
| H | -0.99971700 | -5.05439700 | -2.13000700 |
| H | -1.10979200 | -3.28896300 | -2.06335500 |
| H | -0.33034100 | -4.19480900 | -0.75430000 |
| C | -3.09387500 | -1.96652500 | -0.83098800 |
| H | -3.93265800 | -1.38594700 | -1.20174600 |
| C | -1.92076400 | -1.31829700 | -0.62842800 |
| H | -1.10156000 | -1.87039400 | -0.18487000 |
| C | -1.70210400 | 0.07881600  | -0.93353900 |
| C | -0.51442400 | 0.72803400  | -0.67409100 |
| H | -0.45157000 | 1.77792200  | -0.94513400 |
| C | 0.64373400  | 0.16668200  | -0.08170600 |
| H | 0.61817800  | -0.87965700 | 0.20581400  |
| C | 1.79413100  | 0.88263300  | 0.14887200  |
| H | 1.80890100  | 1.92921900  | -0.14247100 |
| C | 2.97528600  | 0.36597600  | 0.74289300  |
| C | 4.05866800  | 1.22972300  | 0.90761100  |
| H | 3.93169400  | 2.25407000  | 0.56740300  |
| C | 5.28622900  | 0.89040200  | 1.47142700  |
| H | 5.47279300  | -0.11312000 | 1.82878700  |
| C | -2.81716600 | 0.86990000  | -1.56448000 |
| H | -2.51695400 | 1.90277100  | -1.74445900 |
| H | -3.12005200 | 0.43266500  | -2.52109700 |
| H | -3.70301300 | 0.88467400  | -0.92068300 |
| C | 3.01864900  | -1.07802900 | 1.17162600  |
| H | 2.83485000  | -1.73620000 | 0.31744400  |
| H | 3.97035000  | -1.37329300 | 1.60902000  |
| H | 2.24173500  | -1.27954600 | 1.91489200  |
| N | 6.29201900  | 1.74156400  | 1.61160100  |
| C | 7.61991800  | 1.46439400  | 2.19651900  |
| H | 8.37196000  | 1.70371200  | 1.43676000  |
| C | 7.81522900  | 0.03243800  | 2.68066400  |
| H | 7.06977000  | -0.21443300 | 3.44775300  |
| C | 9.21899000  | -0.16357600 | 3.27221400  |
| H | 9.97059500  | 0.08684700  | 2.51319200  |
| H | 9.36496500  | 0.54077200  | 4.10065400  |
| C | 9.44532900  | -1.59290500 | 3.76728400  |
| H | 10.44924700 | -1.70807700 | 4.18337900  |
| H | 8.72827300  | -1.85913700 | 4.55091700  |
| H | 9.33847600  | -2.31627500 | 2.95214600  |
| H | 7.76495900  | 2.15971600  | 3.03051900  |
| H | 7.67946200  | -0.67166800 | 1.84947200  |
| H | 6.15354900  | 2.69245900  | 1.28781400  |

Table S1.8: 8-cis

|   |             |             |             |
|---|-------------|-------------|-------------|
| C | -5.37161800 | 2.14417800  | -5.02582800 |
| C | -5.47640200 | 1.39365600  | -3.70864600 |
| C | -4.15890800 | 1.16470600  | -3.01704800 |
| C | -2.95429600 | 1.38549700  | -3.61661800 |
| C | -2.84248600 | 1.79039600  | -5.09929300 |
| C | -4.19572200 | 1.59194900  | -5.81295200 |
| H | -6.30136000 | 2.04109400  | -5.59314000 |
| H | -6.14564800 | 1.91186100  | -3.00990300 |
| H | -4.35687700 | 0.51863800  | -5.97936000 |
| H | -4.13419800 | 2.05445400  | -6.80384200 |
| H | -5.23922500 | 3.21483000  | -4.83682400 |
| H | -5.93989500 | 0.40798400  | -3.86856200 |
| C | -2.42639900 | 3.26812000  | -5.23968500 |
| H | -1.47984600 | 3.49191800  | -4.74399500 |
| H | -2.31267200 | 3.52350900  | -6.29836400 |
| H | -3.17732700 | 3.93734600  | -4.81136000 |
| C | -1.83883500 | 0.88920600  | -5.84466200 |
| H | -0.80198700 | 1.03999500  | -5.54242700 |
| H | -2.07973700 | -0.16787400 | -5.69416200 |
| H | -1.89783700 | 1.09458400  | -6.91834300 |
| C | -4.34175800 | 0.69913800  | -1.59046900 |
| H | -4.26587300 | 1.53767800  | -0.88811800 |
| H | -5.34049500 | 0.27258000  | -1.46722600 |
| H | -3.62584100 | -0.06408600 | -1.27794200 |
| C | -1.77096700 | 1.23104100  | -2.78668900 |
| C | -0.48556200 | 1.60569100  | -3.01232900 |
| H | -0.22693100 | 2.13895700  | -3.91774100 |
| C | 0.60694600  | 1.42103600  | -2.08565200 |
| C | 0.54403400  | 0.54728100  | -1.02318600 |
| H | -0.34673800 | -0.06454900 | -0.91484000 |
| C | 1.54896900  | 0.34999600  | -0.05656500 |
| H | 2.45868100  | 0.93569200  | -0.13689200 |
| C | 1.44200300  | -0.54374400 | 0.98573100  |
| H | 0.52896600  | -1.12897300 | 1.06458600  |
| C | 2.43318700  | -0.76512700 | 1.96522600  |
| C | 2.17620100  | -1.71400900 | 2.95725600  |
| H | 1.22005700  | -2.23068800 | 2.91717100  |
| C | 3.04035400  | -2.05700500 | 3.98699100  |
| H | 4.01099200  | -1.58227700 | 4.08683600  |
| C | 1.82340400  | 2.24732600  | -2.40012200 |
| H | 2.67233000  | 2.06894100  | -1.74218500 |
| H | 2.14753700  | 2.04469100  | -3.42648500 |
| H | 1.57282000  | 3.31270100  | -2.35525500 |
| C | 3.72006200  | 0.01483200  | 1.91019900  |
| H | 3.51710300  | 1.08807500  | 1.96390600  |
| H | 4.41121700  | -0.22596100 | 2.71584700  |
| H | 4.23917900  | -0.17505100 | 0.96642300  |
| N | 2.78199900  | -2.96389200 | 4.91197900  |
| C | 3.66219600  | -3.32702800 | 6.02158400  |
| C | 3.05105300  | -2.99621300 | 7.37995100  |
| H | 2.84677400  | -1.92012700 | 7.43020000  |
| C | 3.96233700  | -3.41262500 | 8.53454400  |
| H | 4.16678300  | -4.48828000 | 8.46621100  |
| H | 4.93121300  | -2.90790600 | 8.43245100  |
| C | 3.35868300  | -3.09100700 | 9.89837300  |
| H | 4.02895900  | -3.39698000 | 10.70569500 |
| H | 3.17418500  | -2.01736300 | 10.00722000 |
| H | 2.40557600  | -3.61020200 | 10.04215900 |
| H | 2.08291900  | -3.50505800 | 7.47670900  |
| H | 1.88395900  | -3.43491300 | 4.87509900  |
| H | -1.96269800 | 0.79373400  | -1.81402500 |
| H | 4.60540700  | -2.79239100 | 5.87876200  |
| H | 3.88201000  | -4.39772400 | 5.94990200  |

**Table S2** Cartesian coordinates for transition state geometries listed in Table 1, and it is called rotation state if imaginary frequency (in parentheses) is more than one.

Table S2.1: **RS(AT/7\_8-cis)(-576.7 -250.5 -222.0 -201.67 -170.9 -143.8 -137.2 -51.7 -39.5 -13.9)**

|   |             |             |             |
|---|-------------|-------------|-------------|
| C | -1.77796125 | 1.74695258  | -5.83451714 |
| C | -1.77796125 | 1.74695258  | -4.31003880 |
| C | -0.39688182 | 1.74695258  | -3.69468419 |
| C | 0.71259051  | 1.43703046  | -4.40553943 |
| C | 0.67522943  | 1.05594280  | -5.90124099 |
| C | -0.76261656 | 0.73296682  | -6.34409373 |
| H | -2.77848787 | 1.51190665  | -6.21064029 |
| H | -2.33581502 | 2.60931074  | -3.92442958 |
| H | -1.03558383 | -0.26110810 | -5.96586530 |
| H | -0.78631563 | 0.66956460  | -7.43783084 |
| H | -1.53238904 | 2.74846734  | -6.20688775 |
| H | -2.31625640 | 0.86272356  | -3.93655618 |
| C | 1.23821062  | 2.22026527  | -6.74175105 |
| H | 2.18218582  | 1.94124051  | -7.22152351 |
| H | 0.53705361  | 2.50341796  | -7.53347398 |
| H | 1.42751968  | 3.10340316  | -6.12462825 |
| C | 1.53140608  | -0.19822903 | -6.16673464 |
| H | 1.39605297  | -0.52158168 | -7.20376079 |
| H | 2.60007298  | -0.01383525 | -6.02169885 |
| H | 1.23425340  | -1.02639490 | -5.51530813 |
| C | -0.40095575 | 2.11590070  | -2.23471442 |
| H | -0.03408523 | 1.29958511  | -1.60528867 |
| H | 0.21134738  | 2.99890681  | -2.03066232 |
| H | -1.42248594 | 2.34121965  | -1.91092895 |
| C | 2.05585316  | 1.42066873  | -3.81293387 |
| C | 2.45530497  | 1.75501520  | -2.56365022 |
| C | 2.60398082  | 0.88834746  | -1.41014706 |
| C | 1.63523959  | 0.85683397  | -0.43699689 |
| H | 0.76593805  | 1.49252337  | -0.57566043 |
| C | 1.66079784  | 0.07517411  | 0.74229798  |
| H | 2.50949993  | -0.58102670 | 0.90523784  |
| C | 0.66637848  | 0.10508543  | 1.69011764  |
| H | -0.18037263 | 0.76516855  | 1.52089099  |
| C | 0.65689016  | -0.65877865 | 2.88371644  |
| C | -0.42750935 | -0.50896296 | 3.74791899  |
| H | -1.20690451 | 0.18919055  | 3.45314832  |
| C | -0.59319233 | -1.17508631 | 4.95738572  |
| H | 0.14716475  | -1.88422156 | 5.31185621  |
| C | 3.86874741  | 0.07663652  | -1.34522131 |
| H | 3.67314195  | -0.99603514 | -1.39862830 |
| H | 4.52644387  | 0.33461725  | -2.18136528 |
| H | 4.42448685  | 0.26668930  | -0.42450617 |
| C | 1.80275659  | -1.59087144 | 3.17689187  |
| H | 1.48514712  | -2.63466443 | 3.18290721  |
| H | 2.58064036  | -1.48999350 | 2.41478242  |
| H | 2.26364572  | -1.38520484 | 4.14424627  |
| N | -1.62763469 | -1.01281349 | 5.76437851  |
| C | -1.83873009 | -1.71799265 | 7.03325003  |
| H | -0.94241756 | -2.31223042 | 7.23211715  |
| C | -3.08145877 | -2.60580053 | 7.00341813  |
| H | -3.96020050 | -1.99631711 | 6.75394799  |
| C | -3.31449140 | -3.30780356 | 8.34401290  |
| H | -2.43374942 | -3.91230631 | 8.59562561  |
| H | -3.40986905 | -2.55524231 | 9.13686480  |
| C | -4.55746424 | -4.19574519 | 8.32729029  |
| H | -4.70182454 | -4.68612502 | 9.29333195  |
| H | -5.45824071 | -3.61166440 | 8.11239564  |
| H | -4.47554877 | -4.97770101 | 7.56537463  |
| H | -1.91959806 | -0.97250372 | 7.83149936  |
| H | -2.97566707 | -3.34901606 | 6.20411123  |
| H | -2.35785282 | -0.36710062 | 5.48261306  |
| H | 2.83709929  | 1.09523388  | -4.46764499 |
| H | 2.69068653  | 2.78707227  | -2.40759335 |

**Table S2.2:TS(AT/11-cis imaginary frequency:-418.01)**

|   |              |             |             |
|---|--------------|-------------|-------------|
| C | 5.53277672   | 1.50442163  | -0.18572056 |
| C | 5.31165070   | 0.15216561  | -0.01651356 |
| C | 4.06794070   | -0.49233739 | -0.31939656 |
| C | 2.77502868   | 0.01919561  | -0.28570056 |
| C | 1.60838668   | -0.68696539 | -0.61197256 |
| C | 0.35086166   | -0.01321839 | -0.42342156 |
| C | -0.87547734  | -0.51470839 | -0.74420257 |
| C | -2.11758136  | 0.23455561  | -0.55426757 |
| C | -3.26987538  | -0.25124839 | 0.00964344  |
| C | -4.43281838  | 0.59236561  | 0.04943344  |
| C | -5.66366540  | 0.19861861  | 0.51691344  |
| C | 1.61031568   | -2.08048841 | -1.16139356 |
| C | -3.34379637  | -1.64767141 | 0.57273344  |
| N | -6.75424540  | 0.98824063  | 0.58310444  |
| H | 4.15593570   | -1.55315141 | -0.53170356 |
| H | 2.62564668   | 1.02701863  | 0.08075644  |
| H | 0.39941366   | 0.98505863  | 0.00546944  |
| H | -0.94871936  | -1.51034741 | -1.17734856 |
| H | -2.12312936  | 1.26184662  | -0.91662057 |
| H | -4.32115238  | 1.60550863  | -0.33019656 |
| H | -5.81842938  | -0.81419041 | 0.87515844  |
| H | -6.67783740  | 1.94488463  | 0.26074344  |
| H | 1.02088566   | -2.12985641 | -2.08447058 |
| H | 1.15034767   | -2.78091441 | -0.45385456 |
| H | 2.60829368   | -2.44591041 | -1.39739758 |
| H | -3.99783538  | -2.29007141 | -0.02830556 |
| H | -3.73944038  | -1.63688841 | 1.59351146  |
| H | -2.35905836  | -2.11555341 | 0.61134245  |
| C | 6.43586672   | -0.81175739 | 0.44073244  |
| C | 6.85809472   | 2.14770763  | 0.13184444  |
| C | 4.51018770   | 2.47054763  | -0.71862056 |
| C | -8.07578142  | 0.54555061  | 1.02775944  |
| C | 7.59711972   | -0.02985339 | 1.09118846  |
| C | 8.02821574   | 1.17689061  | 0.26915044  |
| C | 6.95368072   | -1.61178841 | -0.77543157 |
| C | 5.90698072   | -1.79999941 | 1.50396045  |
| H | 7.28352272   | 0.30833361  | 2.08809546  |
| H | 8.43486574   | -0.71902939 | 1.24339146  |
| H | 8.87574274   | 1.68274163  | 0.74116244  |
| H | 8.36766374   | 0.86179662  | -0.72373356 |
| H | 6.73179872   | 2.70861163  | 1.07403846  |
| H | 7.07406672   | 2.90890163  | -0.62660856 |
| H | 7.39236173   | -0.95813640 | -1.53370458 |
| H | 6.15164372   | -2.18261341 | -1.25498257 |
| H | 7.71827073   | -2.32627141 | -0.45405356 |
| H | 5.44746471   | -1.26686739 | 2.34207446  |
| H | 6.73971972   | -2.39217041 | 1.89635846  |
| H | 5.17258370   | -2.50303541 | 1.10100745  |
| H | 5.00520171   | 3.31925265  | -1.19662956 |
| H | 3.89540470   | 2.88710763  | 0.09181844  |
| H | 3.83446570   | 2.01754963  | -1.44612058 |
| C | -9.07648842  | 0.39962461  | -0.12468656 |
| H | -7.95154942  | -0.41148639 | 1.54396546  |
| H | -8.45710542  | 1.26159961  | 1.76490446  |
| C | -10.46157544 | -0.03685739 | 0.36711544  |
| H | -9.16190142  | 1.35654063  | -0.65655256 |
| H | -8.68835542  | -0.32906939 | -0.84710157 |
| C | -11.46802744 | -0.18216439 | -0.77609356 |
| H | -10.37335844 | -0.99121640 | 0.90281745  |
| H | -10.83578244 | 0.69374861  | 1.09607645  |
| H | -12.44672146 | -0.49456239 | -0.40213256 |
| H | -11.13430944 | -0.92960541 | -1.50347058 |
| H | -11.60103944 | 0.76600461  | -1.30748957 |

**Table S2.3:RS(AT/8\_11-cis)(-1128.7 -402.3 -258.1 -224.0 -206.8 -200.1 -168.1 -79.0 -52.6 -43.0 -28.5 -24.0)**

|   |             |             |             |
|---|-------------|-------------|-------------|
| C | -5.30985333 | 1.75896045  | -5.02928865 |
| C | -5.30985333 | 1.75896045  | -3.50545104 |
| C | -3.93006449 | 1.75896045  | -2.88937376 |
| C | -2.81752756 | 1.45178990  | -3.60324243 |
| C | -2.86241209 | 1.05393157  | -5.09468798 |
| C | -4.30184047 | 0.73595816  | -5.53437096 |
| H | -6.31185496 | 1.53117507  | -5.40548799 |
| H | -5.86515833 | 2.62246036  | -3.11914787 |
| H | -4.58115153 | -0.25449859 | -5.15059212 |
| H | -4.32586759 | 0.66678144  | -6.62763142 |
| H | -5.05650912 | 2.75813681  | -5.40133065 |
| H | -5.84954297 | 0.87574646  | -3.13065285 |
| C | -2.29248597 | 2.20304329  | -5.95098302 |
| H | -1.40787916 | 1.87865498  | -6.50902698 |
| H | -3.03361233 | 2.55177917  | -6.67666686 |
| H | -2.00099888 | 3.05689206  | -5.33198945 |
| C | -2.02072925 | -0.21393073 | -5.34609030 |
| H | -1.29334650 | -0.05698530 | -6.14881798 |
| H | -1.47467468 | -0.52439552 | -4.44943032 |
| H | -2.66843386 | -1.04228820 | -5.65025426 |
| C | -3.94497218 | 2.11460601  | -1.42512840 |
| H | -3.57375665 | 1.29838202  | -0.79839375 |
| H | -3.34778320 | 3.00474200  | -1.20720651 |
| H | -4.97150551 | 2.32735056  | -1.10914908 |
| C | -1.47310598 | 1.49846429  | -3.03263547 |
| C | -1.12909529 | 1.78152801  | -1.75274927 |
| H | -1.90796923 | 2.03355010  | -1.04075240 |
| C | 0.22483499  | 1.81014958  | -1.24289778 |
| C | 0.72435319  | 0.71505133  | -0.57253384 |
| H | 0.04770401  | -0.11743174 | -0.42228065 |
| C | 2.03838702  | 0.59544764  | -0.06395884 |
| H | 2.69978981  | 1.44189559  | -0.22017623 |
| C | 2.58836361  | -0.47489403 | 0.60818036  |
| H | 3.09630799  | -1.21654949 | -0.00206351 |
| C | 2.57774128  | -0.73220648 | 2.00173020  |
| C | 3.20860674  | -1.89723473 | 2.44515544  |
| H | 3.66527994  | -2.53268367 | 1.69068542  |
| C | 3.30305961  | -2.31370162 | 3.76747044  |
| H | 2.87085293  | -1.72874962 | 4.57218344  |
| C | 1.01167374  | 3.06797720  | -1.48694949 |
| H | 0.43789434  | 3.75164205  | -2.12042569 |
| H | 1.24583647  | 3.59819843  | -0.56251838 |
| H | 1.95168653  | 2.86198492  | -2.00440268 |
| C | 1.91000916  | 0.22570298  | 2.94940982  |
| H | 2.36204972  | 1.21830364  | 2.86803628  |
| H | 0.84885084  | 0.32650390  | 2.70356660  |
| H | 1.97517887  | -0.07766196 | 3.99265540  |
| N | 3.90680595  | -3.42389313 | 4.16008306  |
| C | 4.02352290  | -3.88611139 | 5.54729222  |
| C | 3.31138811  | -2.95817364 | 6.53005318  |
| H | 3.73146162  | -1.94796433 | 6.44547867  |
| C | 3.43760780  | -3.44989845 | 7.97471304  |
| H | 3.02296923  | -4.46307651 | 8.05140262  |
| H | 4.49945809  | -3.52930948 | 8.24029753  |
| C | 2.72847780  | -2.52941353 | 8.96671634  |
| H | 2.83248243  | -2.90063909 | 9.98944039  |
| H | 3.14527310  | -1.51746469 | 8.93542373  |
| H | 1.65862195  | -2.45798770 | 8.74530842  |
| H | 2.25131413  | -2.88318295 | 6.25636820  |
| H | 4.33279121  | -4.01316367 | 3.45258414  |
| H | -0.66699154 | 1.28437772  | -3.70289399 |
| H | 5.05971880  | -3.93828680 | 5.80897102  |
| H | 3.59691238  | -4.86442738 | 5.62345843  |

Table S2.4:RS(AT/9\_11-cis)(-148.6 -113.6 -62.9 -32.3 -13.1 -12.2)

|   |             |             |             |
|---|-------------|-------------|-------------|
| C | -4.12249943 | 2.13198030  | -5.51010235 |
| C | -4.12249943 | 2.13198030  | -3.98406317 |
| C | -2.74399009 | 2.13198030  | -3.36005323 |
| C | -1.62894471 | 1.81740042  | -4.06677691 |
| C | -1.65583136 | 1.48770463  | -5.57553285 |
| C | -3.08860599 | 1.13926041  | -6.02513799 |
| H | -5.11917744 | 1.87820606  | -5.88416430 |
| H | -4.68453323 | 2.99245587  | -3.60295254 |
| H | -3.34185581 | 0.13668541  | -5.65508992 |
| H | -3.10880887 | 1.08457188  | -7.11941015 |
| H | -3.89862752 | 3.13860781  | -5.88058467 |
| H | -4.65897433 | 1.24497704  | -3.61226160 |
| C | -1.12856373 | 2.69191217  | -6.38459378 |
| H | -0.10753816 | 2.96256947  | -6.09577163 |
| H | -1.10997271 | 2.44710164  | -7.45171955 |
| H | -1.75578675 | 3.57631247  | -6.24716028 |
| C | -0.76769931 | 0.26187332  | -5.87142996 |
| H | 0.19988436  | 0.55623118  | -6.28994871 |
| H | -0.57829189 | -0.32278594 | -4.96565350 |
| H | -1.25774332 | -0.39157875 | -6.60035953 |
| C | -2.75433497 | 2.53094149  | -1.90547538 |
| H | -3.06579328 | 1.69242468  | -1.26842496 |
| H | -1.78616837 | 2.88221815  | -1.54805647 |
| H | -3.48575204 | 3.32862271  | -1.74372953 |
| C | -0.28663472 | 1.82280883  | -3.48704497 |
| H | 0.49209522  | 2.19331945  | -4.14933772 |
| C | 0.09122347  | 1.36214094  | -2.26970752 |
| H | -0.66039205 | 0.91158057  | -1.63346843 |
| C | 1.44798654  | 1.39111644  | -1.77487448 |
| C | 1.78705602  | 0.86531117  | -0.54419722 |
| C | 1.17904396  | 1.20151410  | 0.68951627  |
| H | 0.38100422  | 1.93639117  | 0.64632803  |
| C | 1.45324699  | 0.72725026  | 1.95532881  |
| H | 1.66392476  | 1.48366327  | 2.70589863  |
| C | 1.50030818  | -0.61178223 | 2.42307643  |
| C | 1.80815578  | -0.80592367 | 3.77259352  |
| H | 1.99093849  | 0.08170613  | 4.37248962  |
| C | 1.90317886  | -2.03577414 | 4.41337751  |
| H | 1.73460363  | -2.96248299 | 3.87587550  |
| C | 2.51844960  | 2.01343939  | -2.63076458 |
| H | 2.60137386  | 1.49292262  | -3.59051154 |
| H | 2.28534409  | 3.05995597  | -2.84979424 |
| H | 3.49569716  | 1.98057452  | -2.14891192 |
| C | 1.22857646  | -1.76259226 | 1.49501080  |
| H | 0.22673467  | -1.67611357 | 1.06463950  |
| H | 1.94311357  | -1.76063540 | 0.66681688  |
| H | 1.29269789  | -2.73553879 | 1.97852137  |
| N | 2.20097729  | -2.18993575 | 5.69473135  |
| C | 2.28710219  | -3.47504750 | 6.40014140  |
| H | 2.16600673  | -4.26813856 | 5.65676451  |
| C | 1.23640465  | -3.60385517 | 7.50275537  |
| H | 1.34520992  | -2.77184847 | 8.21128543  |
| C | 1.35936779  | -4.93180898 | 8.25711270  |
| H | 1.25525625  | -5.76353738 | 7.54847162  |
| H | 2.36604179  | -5.01463895 | 8.68624046  |
| C | 0.31613732  | -5.06977247 | 9.36582774  |
| H | 0.42277211  | -6.02388429 | 9.88819967  |
| H | 0.41903194  | -4.27073637 | 10.10728303 |
| H | -0.70016370 | -5.02276546 | 8.96125148  |
| H | 3.29435032  | -3.57184722 | 6.81926904  |
| H | 0.23619325  | -3.51473892 | 7.06202496  |
| H | 2.36283649  | -1.35949695 | 6.25429495  |
| H | 2.57588852  | 0.14275170  | -0.52072163 |



**Table S2.5:TS(11-cis/11\_14-cis imaginary frequency:-329.09)**

|   |             |             |             |
|---|-------------|-------------|-------------|
| C | -6.74610233 | 2.49527477  | 0.05367479  |
| C | -5.41717932 | 2.85117577  | -0.60980721 |
| C | -4.47859232 | 1.67424577  | -0.78543321 |
| C | -4.64313332 | 0.50704376  | -0.11850821 |
| C | -5.82705033 | 0.24744976  | 0.83901879  |
| C | -6.49710333 | 1.57691177  | 1.24513880  |
| H | -7.26374033 | 3.40606378  | 0.37176779  |
| H | -5.59430933 | 3.31271577  | -1.58876822 |
| H | -5.84740732 | 2.09466577  | 1.96397980  |
| H | -7.43289633 | 1.35251177  | 1.77011380  |
| H | -7.40221733 | 2.00163777  | -0.67238321 |
| H | -4.89863532 | 3.61793277  | -0.01282621 |
| C | -6.86193833 | -0.67412424 | 0.15473779  |
| H | -6.42092833 | -1.63259025 | -0.13763721 |
| H | -7.68546934 | -0.88955124 | 0.84395879  |
| H | -7.27825733 | -0.21248924 | -0.74422321 |
| C | -5.33102233 | -0.43687224 | 2.13045380  |
| H | -6.16149333 | -0.54196724 | 2.83655380  |
| H | -4.92882632 | -1.43641825 | 1.94031880  |
| H | -4.54787632 | 0.15792776  | 2.61132780  |
| C | -3.37523131 | 1.94344277  | -1.77983922 |
| H | -2.60353531 | 2.59532077  | -1.34868722 |
| H | -2.88711131 | 1.03490777  | -2.13225322 |
| H | -3.77860832 | 2.47401277  | -2.64886822 |
| C | -3.74448931 | -0.64685724 | -0.28007221 |
| H | -4.24386532 | -1.61069625 | -0.35089221 |
| C | -2.39600231 | -0.62869424 | -0.28286021 |
| H | -1.88319331 | 0.31882076  | -0.14361821 |
| C | -1.53373631 | -1.79714925 | -0.42759821 |
| C | -0.18219030 | -1.60530725 | -0.37177821 |
| H | 0.14394270  | -0.58487324 | -0.22257721 |
| C | 0.81286870  | -2.63549725 | -0.49377921 |
| H | 0.41875870  | -3.63535626 | -0.64698521 |
| C | 2.17220071  | -2.59053725 | -0.45174221 |
| C | 3.09070571  | -1.47785725 | -0.26950221 |
| C | 4.42161672  | -1.75068625 | -0.25012121 |
| H | 4.77689172  | -2.76661725 | -0.41272921 |
| C | 5.48914473  | -0.76258925 | -0.10596921 |
| C | -2.19202331 | -3.13597225 | -0.62664621 |
| H | -2.83963531 | -3.37314826 | 0.22390479  |
| H | -2.82549731 | -3.12153326 | -1.51904322 |
| H | -1.48418931 | -3.95518226 | -0.73795022 |
| C | 2.59516871  | -0.06187824 | -0.11563121 |
| H | 1.99692271  | 0.23109776  | -0.98218321 |
| H | 1.96022371  | 0.03922176  | 0.76878679  |
| H | 3.41314172  | 0.65719876  | -0.02042921 |
| H | 2.67447771  | -3.54634526 | -0.57327821 |
| N | 5.99637773  | -0.45807824 | 1.04309779  |
| C | 7.11521673  | 0.47891476  | 1.33016979  |
| C | 7.71587974  | 1.14634176  | 0.10124279  |
| C | 8.86138374  | 2.09150477  | 0.49991679  |
| H | 8.48207874  | 2.84831077  | 1.19769279  |
| H | 9.62971374  | 1.52374577  | 1.03910580  |
| C | 9.48766374  | 2.77916278  | -0.71425921 |
| H | 10.29818775 | 3.44464077  | -0.40801621 |
| H | 9.90503375  | 2.04766477  | -1.41368222 |
| H | 8.74988474  | 3.38114877  | -1.25451422 |
| H | 5.93400472  | -0.27584024 | -0.97285221 |
| H | 5.58543373  | -0.91618724 | 1.85707180  |
| H | 7.87409874  | -0.10104624 | 1.86505480  |
| H | 6.72153973  | 1.22812976  | 2.02439380  |
| H | 8.10621974  | 0.39069176  | -0.59236221 |
| H | 6.95088073  | 1.72375977  | -0.43362521 |

**Table S2.6: TS(11-cis/9\_11-cis imaginary frequency:-467.16)**

|   |              |             |             |
|---|--------------|-------------|-------------|
| C | 7.08185431   | 1.87003504  | 0.96826975  |
| C | 5.99075031   | 2.43362304  | 0.06820275  |
| C | 4.85861630   | 1.49105604  | -0.21449225 |
| C | 4.94261130   | 0.13944303  | 0.08591175  |
| C | 6.26454131   | -0.51499197 | 0.57420275  |
| C | 7.44704331   | 0.47340503  | 0.47912275  |
| H | 7.95452232   | 2.52829204  | 0.94961075  |
| H | 5.56202830   | 3.35868904  | 0.47751475  |
| H | 7.78059332   | 0.53814803  | -0.56533325 |
| H | 8.28550132   | 0.06343603  | 1.05036576  |
| H | 6.73646631   | 1.83759204  | 2.00753576  |
| H | 6.41788331   | 2.73038504  | -0.90374926 |
| C | 6.08862531   | -0.97685697 | 2.03751076  |
| H | 5.25736630   | -1.68340698 | 2.13802676  |
| H | 6.99561431   | -1.48179498 | 2.38310176  |
| H | 5.89055731   | -0.13601597 | 2.70808076  |
| C | 6.62132931   | -1.73650998 | -0.30264525 |
| H | 7.62143732   | -2.08843898 | -0.03308925 |
| H | 5.94446930   | -2.58418298 | -0.15965525 |
| H | 6.63297131   | -1.47492498 | -1.36512426 |
| C | 3.69702630   | 2.15740304  | -0.89050725 |
| H | 4.04416030   | 3.04052305  | -1.43278526 |
| H | 3.16827729   | 1.50979904  | -1.58960126 |
| H | 2.97203530   | 2.51805604  | -0.14839025 |
| C | 3.84282430   | -0.74816598 | -0.02915525 |
| H | 4.11396030   | -1.79628798 | 0.03619575  |
| C | 2.46639829   | -0.49772797 | -0.12319225 |
| H | 2.08468129   | 0.50803803  | -0.03875525 |
| C | 1.51311629   | -1.49284098 | -0.27259725 |
| C | 0.08112528   | -1.11940298 | -0.27071725 |
| C | -0.60722572  | -0.84967597 | -1.40385425 |
| C | -1.99001973  | -0.48878597 | -1.60543426 |
| C | -2.91485873  | -0.01620897 | -0.71454325 |
| C | -4.25942774  | 0.23262003  | -1.17849826 |
| H | -4.44100674  | 0.04847703  | -2.23493726 |
| C | -5.30483174  | 0.63961603  | -0.41053025 |
| H | -5.18335774  | 0.80822103  | 0.65482075  |
| C | 1.80249629   | -2.94637899 | -0.44650525 |
| H | 1.42144729   | -3.25790498 | -1.42773225 |
| H | 2.85153929   | -3.23207998 | -0.37864625 |
| H | 1.22272928   | -3.52118099 | 0.28401675  |
| C | -2.56594773  | 0.26989103  | 0.72489075  |
| H | -1.53928373  | 0.63376303  | 0.81236576  |
| H | -3.21565274  | 1.03364104  | 1.15455075  |
| H | -2.65560573  | -0.62838497 | 1.34779276  |
| H | -2.32551173  | -0.60148597 | -2.63261826 |
| N | -6.56759775  | 0.87464503  | -0.85584825 |
| C | -7.69257376  | 1.20702903  | 0.01364475  |
| H | -7.28901275  | 1.64774204  | 0.93208075  |
| C | -8.57900376  | 0.00591603  | 0.35698775  |
| H | -8.95329576  | -0.44403397 | -0.57228325 |
| C | -9.76082976  | 0.38820703  | 1.25427075  |
| H | -9.38248476  | 0.84142904  | 2.18045976  |
| H | -10.35985277 | 1.16196303  | 0.75596675  |
| C | -10.65202177 | -0.80741397 | 1.59652276  |
| H | -11.48689677 | -0.50999597 | 2.23715276  |
| H | -11.07033177 | -1.25820297 | 0.69031275  |
| H | -10.08561877 | -1.58275298 | 2.12343776  |
| H | -8.29235776  | 1.98653704  | -0.46962725 |
| H | -7.96754075  | -0.76098697 | 0.84985875  |
| H | -6.76527775  | 0.73166603  | -1.83555526 |
| H | -0.39064572  | -1.13793397 | 0.70725275  |
| H | -0.04646372  | -0.93465597 | -2.33645626 |

**Table S2.7:RS(AT/9-cis)(-797.3 -712.9 -201.3 -177.2 -120.4 -93.5 -64.5 -46.5 -28.6 -4.3)**

|   |             |             |             |
|---|-------------|-------------|-------------|
| C | -4.88380134 | -2.09136164 | -5.04490700 |
| C | -4.88380134 | -2.09136164 | -3.52083736 |
| C | -3.50306449 | -2.09136164 | -2.90593911 |
| C | -2.39187610 | -2.39798112 | -3.61973097 |
| C | -2.43602892 | -2.79677753 | -5.11084932 |
| C | -3.87564453 | -3.11441870 | -5.55017983 |
| H | -5.88594147 | -2.31963058 | -5.42063049 |
| H | -5.43951817 | -1.22768702 | -3.13490316 |
| H | -4.15458055 | -4.10486219 | -5.16637797 |
| H | -3.89995841 | -3.18359276 | -6.64343066 |
| H | -4.63052749 | -1.09233873 | -5.41775093 |
| H | -5.42356378 | -2.97472461 | -3.14665972 |
| C | -1.86572726 | -1.64775797 | -5.96722655 |
| H | -0.84093061 | -1.39793315 | -5.67285129 |
| H | -1.84433252 | -1.93758509 | -7.02299342 |
| H | -2.46647814 | -0.73883476 | -5.87478054 |
| C | -1.59331949 | -4.06418247 | -5.36062569 |
| H | -1.74396776 | -4.40652860 | -6.38942734 |
| H | -0.52054962 | -3.88898031 | -5.23481081 |
| H | -1.89046949 | -4.87604450 | -4.68913028 |
| C | -3.51747887 | -1.74322060 | -1.43911270 |
| H | -4.16882971 | -2.43692895 | -0.89389452 |
| H | -2.53044074 | -1.77315501 | -0.97757531 |
| H | -3.93724641 | -0.74226366 | -1.28402972 |
| C | -1.04547452 | -2.35482102 | -3.04824739 |
| H | -0.24451612 | -2.62350188 | -3.73156626 |
| C | -0.70531917 | -2.02294392 | -1.78053152 |
| H | -1.49177341 | -1.75173428 | -1.08520567 |
| C | 0.64865568  | -2.00394155 | -1.27501029 |
| C | 0.90175799  | -1.64808229 | 0.02994596  |
| H | 0.96350156  | -2.45000995 | 0.76099457  |
| C | 1.09408454  | -0.33632492 | 0.52469225  |
| H | 1.03918135  | 0.49006715  | -0.17668811 |
| C | 1.34755011  | -0.05756386 | 1.84581165  |
| H | 1.40134721  | -0.89096709 | 2.54138319  |
| C | 1.54753437  | 1.23943387  | 2.38181284  |
| C | 1.79602222  | 1.35101315  | 3.74922836  |
| H | 1.82128877  | 0.43064885  | 4.32727561  |
| C | 2.01380229  | 2.54150205  | 4.43614798  |
| H | 2.00144371  | 3.49344030  | 3.91937649  |
| C | 1.77507636  | -2.38078339 | -2.19766536 |
| H | 2.34268542  | -3.22211380 | -1.79326241 |
| H | 1.39125705  | -2.68016337 | -3.17772765 |
| H | 2.47166486  | -1.55478490 | -2.35646947 |
| C | 1.48631765  | 2.43608152  | 1.46945685  |
| H | 1.24031841  | 2.12554608  | 0.44994145  |
| H | 0.72610205  | 3.15182115  | 1.78527386  |
| H | 2.43802498  | 2.96860277  | 1.42906115  |
| N | 2.24549681  | 2.61537946  | 5.73544226  |
| C | 2.49370904  | 3.83948854  | 6.51140055  |
| C | 3.65998217  | 4.66842352  | 5.98412075  |
| H | 4.57584266  | 4.06306223  | 5.98141688  |
| C | 3.88880806  | 5.92125202  | 6.83651572  |
| H | 2.97307454  | 6.52549735  | 6.84652904  |
| H | 4.07580744  | 5.62388875  | 7.87584039  |
| C | 5.05512695  | 6.76585223  | 6.32646156  |
| H | 5.19792470  | 7.65242112  | 6.94936671  |
| H | 5.99081399  | 6.19731581  | 6.33760779  |
| H | 4.88016083  | 7.10489972  | 5.30016566  |
| H | 3.46500513  | 4.96386657  | 4.94568074  |
| H | 2.27128947  | 1.74780005  | 6.26075566  |
| H | 1.60962546  | 4.44190756  | 6.49171470  |
| H | 2.69951759  | 3.56583019  | 7.52513325  |

**Table S3** Cartesian coordinates for representative conical intersection geometries listed in Table 1.

Table S3.1: CI(AT/7\_8-cis)

|   |             |             |             |
|---|-------------|-------------|-------------|
| C | -1.77728132 | 1.74565161  | -5.83595447 |
| C | -1.77974299 | 1.74633915  | -4.30964572 |
| C | -0.39541811 | 1.74775533  | -3.69425507 |
| C | 0.70846195  | 1.43341718  | -4.40554751 |
| C | 0.67546127  | 1.05462882  | -5.90446362 |
| C | -0.76056754 | 0.73702549  | -6.34452279 |
| H | -2.77586756 | 1.51473141  | -6.20996385 |
| H | -2.34483856 | 2.60360875  | -3.92413483 |
| H | -1.04402509 | -0.26584956 | -5.95364564 |
| H | -0.78956315 | 0.66246582  | -7.44147708 |
| H | -1.54147270 | 2.74688747  | -6.18690172 |
| H | -2.31195628 | 0.86850094  | -3.93905126 |
| C | 1.23837309  | 2.21961101  | -6.74227784 |
| H | 2.17100020  | 1.94337665  | -7.22929810 |
| H | 0.52906260  | 2.50535829  | -7.53780797 |
| H | 1.42257969  | 3.12152415  | -6.11844390 |
| C | 1.53614630  | -0.19625747 | -6.16746381 |
| H | 1.39347157  | -0.53418437 | -7.20898949 |
| H | 2.60705693  | -0.02376175 | -6.01768331 |
| H | 1.23095811  | -1.02341057 | -5.52425011 |
| C | -0.40121279 | 2.11712296  | -2.23222604 |
| H | -0.03182402 | 1.29259570  | -1.61101689 |
| H | 0.20586994  | 3.00403658  | -2.02137854 |
| H | -1.42001045 | 2.33455948  | -1.92189298 |
| C | 2.05586139  | 1.42212118  | -3.81250282 |
| C | 2.45647651  | 1.75297420  | -2.55958165 |
| C | 2.60157194  | 0.88703840  | -1.41025268 |
| C | 1.63412368  | 0.85518496  | -0.43801942 |
| H | 0.75827916  | 1.49886546  | -0.57077924 |
| C | 1.66262621  | 0.07622620  | 0.74065467  |
| H | 2.51388311  | -0.57995150 | 0.89646922  |
| C | 0.66661380  | 0.10319246  | 1.68787392  |
| H | -0.18337398 | 0.76650055  | 1.51918455  |
| C | 0.65677290  | -0.65749046 | 2.88217441  |
| C | -0.42622406 | -0.50791569 | 3.74996972  |
| H | -1.20080262 | 0.20515076  | 3.44917481  |
| C | -0.59545307 | -1.17783418 | 4.96147458  |
| H | 0.14578201  | -1.89569781 | 5.31706730  |
| C | 3.86860517  | 0.07768609  | -1.34586424 |
| H | 3.68399691  | -0.99513585 | -1.39405167 |
| H | 4.52618361  | 0.34136159  | -2.17558095 |
| H | 4.42088430  | 0.25817629  | -0.43035103 |
| C | 1.80122740  | -1.59111144 | 3.17585902  |
| H | 1.48303729  | -2.63941505 | 3.18394132  |
| H | 2.58145885  | -1.48921084 | 2.41677700  |
| H | 2.26193114  | -1.38010806 | 4.14561230  |
| N | -1.62739991 | -1.01240161 | 5.76574449  |
| C | -1.83938509 | -1.71737219 | 7.03407574  |
| H | -0.93247030 | -2.31090308 | 7.23385730  |
| C | -3.08145896 | -2.60758250 | 7.00357062  |
| H | -3.95995354 | -1.98463721 | 6.75623802  |
| C | -3.31630450 | -3.30746222 | 8.34455443  |
| H | -2.43313657 | -3.91436346 | 8.59965813  |
| H | -3.41348983 | -2.56419422 | 9.13147097  |
| C | -4.55665884 | -4.19356412 | 8.32614067  |
| H | -4.69444276 | -4.68353780 | 9.29576986  |
| H | -5.44852605 | -3.61305654 | 8.09858402  |
| H | -4.47702864 | -4.97183403 | 7.55835744  |
| H | -1.90393662 | -0.97056093 | 7.84509534  |
| H | -2.97882003 | -3.35230062 | 6.20406172  |
| H | -2.35680587 | -0.36516615 | 5.47671795  |
| H | 2.85780882  | 1.10336428  | -4.48362803 |
| H | 2.69300107  | 2.79111305  | -2.40745176 |

Table S3.2:CI(AT/11-cis)

|   |              |             |             |
|---|--------------|-------------|-------------|
| C | 5.56905604   | 1.53135275  | 0.14969875  |
| C | 5.19682039   | 0.22549775  | 0.07277330  |
| C | 3.91606361   | -0.31047235 | -0.34990621 |
| C | 2.66671948   | 0.16197162  | -0.17197787 |
| C | 1.53996202   | -0.63532433 | -0.63705128 |
| C | 0.22387669   | -0.07708137 | -0.59462461 |
| C | -0.92241877  | -0.60446520 | -1.15597612 |
| C | -2.19783191  | 0.13577138  | -1.14522835 |
| C | -3.26478091  | -0.05967486 | -0.23612955 |
| C | -4.45475210  | 0.60782145  | -0.53153591 |
| C | -5.58697186  | 0.56400280  | 0.34825497  |
| C | 1.77777917   | -1.95030583 | -1.29842602 |
| C | -3.14255325  | -0.99232813 | 0.96875349  |
| N | -6.72002849  | 1.17710212  | 0.06912690  |
| H | 3.99478276   | -1.31615996 | -0.82502018 |
| H | 2.36833656   | 1.08066063  | 0.32802129  |
| H | 0.14663835   | 0.88909090  | -0.05973759 |
| H | -0.73499048  | -1.49557645 | -1.86324393 |
| H | -2.39694474  | 0.89099866  | -1.84029957 |
| H | -4.52686338  | 1.24186523  | -1.39766140 |
| H | -5.59489765  | -0.01162467 | 1.27028293  |
| H | -6.72072389  | 1.72332507  | -0.79643589 |
| H | 2.29091570   | -2.67040123 | -0.69953376 |
| H | 2.38184471   | -1.92150584 | -2.18906603 |
| H | 0.82926293   | -2.46875381 | -1.55837340 |
| H | -4.01067377  | -1.63910307 | 1.07054648  |
| H | -3.06261665  | -0.40754087 | 1.91306217  |
| H | -2.28082319  | -1.61632314 | 0.87737330  |
| C | 6.24741851   | -0.91615956 | 0.28222717  |
| C | 6.93354563   | 1.95584629  | 0.54845714  |
| C | 4.63074279   | 2.68070544  | 0.03677403  |
| C | -7.99708089  | 1.06648030  | 0.82819635  |
| C | 7.40292928   | -0.37599022 | 1.09813280  |
| C | 8.01934337   | 0.91944602  | 0.49297922  |
| C | 6.74316362   | -1.50583761 | -1.05317852 |
| C | 5.68515938   | -2.04528226 | 1.13920612  |
| H | 7.13410029   | -0.13813660 | 2.12866987  |
| H | 8.25280548   | -1.13263459 | 1.11140661  |
| H | 8.87534401   | 1.27183971  | 1.10187588  |
| H | 8.43479879   | 0.73645596  | -0.50254678 |
| H | 6.86205285   | 2.21516444  | 1.57802737  |
| H | 7.25092176   | 2.87038145  | 0.02734433  |
| H | 7.21019792   | -0.78483248 | -1.71219601 |
| H | 5.90985181   | -1.99002230 | -1.56672253 |
| H | 7.44987491   | -2.33443604 | -0.88872339 |
| H | 5.28147964   | -1.67440157 | 2.08340833  |
| H | 6.49573927   | -2.77253836 | 1.38147302  |
| H | 4.88397360   | -2.57391528 | 0.66493173  |
| H | 5.14865410   | 3.60155588  | -0.31385895 |
| H | 4.27542422   | 2.91779867  | 1.05191927  |
| H | 3.74180888   | 2.48967426  | -0.59772137 |
| C | -8.94822491  | 0.17580231  | -0.04269404 |
| H | -7.81623336  | 0.57972462  | 1.76070278  |
| H | -8.42553558  | 2.03242740  | 1.06235866  |
| C | -10.31512873 | -0.04490815 | 0.68497781  |
| H | -9.15581898  | 0.68874783  | -1.01324283 |
| H | -8.48736326  | -0.78426723 | -0.26202686 |
| C | -11.13236650 | -1.31963880 | 0.16479779  |
| H | -10.15112548 | -0.19735336 | 1.75781775  |
| H | -10.90604262 | 0.87405437  | 0.57291363  |
| H | -12.04334662 | -1.28776929 | 0.73309534  |
| H | -10.58030406 | -2.22967795 | 0.37306524  |
| H | -11.37343899 | -1.28694949 | -0.90388464 |

Table S3.3:CI(AT/8\_11-cis)

|   |             |             |             |
|---|-------------|-------------|-------------|
| C | -5.31536688 | 1.74337479  | -5.02486053 |
| C | -5.31212058 | 1.75795259  | -3.50687485 |
| C | -3.94061449 | 1.76122012  | -2.89440613 |
| C | -2.80855147 | 1.46283542  | -3.59674319 |
| C | -2.85990425 | 1.05855132  | -5.09605023 |
| C | -4.30420146 | 0.74766274  | -5.53247853 |
| H | -6.31064045 | 1.57463968  | -5.42822237 |
| H | -5.89739079 | 2.63296230  | -3.14561704 |
| H | -4.60950114 | -0.25658640 | -5.10236721 |
| H | -4.29710035 | 0.65605298  | -6.65653419 |
| H | -5.03825145 | 2.76709115  | -5.39713576 |
| H | -5.84674733 | 0.81075079  | -3.11461848 |
| C | -2.29182987 | 2.18974359  | -5.95717233 |
| H | -1.43193386 | 1.85417150  | -6.52521815 |
| H | -3.04498265 | 2.53437166  | -6.68458877 |
| H | -2.01211456 | 3.07635231  | -5.30620120 |
| C | -2.01987017 | -0.21014767 | -5.35442432 |
| H | -1.28689455 | -0.03977972 | -6.09583524 |
| H | -1.49302846 | -0.52615568 | -4.44994336 |
| H | -2.66714347 | -1.03793442 | -5.68276994 |
| C | -3.94752108 | 2.12256924  | -1.41607912 |
| H | -3.57010585 | 1.30663045  | -0.84261264 |
| H | -3.33994073 | 3.01343594  | -1.20281847 |
| H | -4.97869413 | 2.29820822  | -1.15757565 |
| C | -1.47031205 | 1.50159032  | -3.02880209 |
| C | -1.12614172 | 1.77816411  | -1.75674687 |
| H | -1.91739300 | 2.02480645  | -1.02018071 |
| C | 0.23904657  | 1.81412874  | -1.24152150 |
| C | 0.72218606  | 0.70316514  | -0.56818494 |
| H | 0.03569386  | -0.14139177 | -0.39539505 |
| C | 2.04361013  | 0.59582954  | -0.06639296 |
| H | 2.67365064  | 1.42648322  | -0.16196339 |
| C | 2.58777820  | -0.48070477 | 0.61143945  |
| H | 3.07843410  | -1.22449165 | 0.01220451  |
| C | 2.57980805  | -0.73109282 | 1.99595051  |
| C | 3.20221392  | -1.91050857 | 2.44706048  |
| H | 3.69735741  | -2.55055295 | 1.66907695  |
| C | 3.31247789  | -2.30861060 | 3.75693205  |
| H | 2.87664125  | -1.70367223 | 4.56446338  |
| C | 1.01157007  | 3.07204251  | -1.48210695 |
| H | 0.44015304  | 3.73233062  | -2.13461944 |
| H | 1.23247674  | 3.57837358  | -0.53811340 |
| H | 1.95229432  | 2.88524399  | -1.96076976 |
| C | 1.91180955  | 0.22503097  | 2.95702049  |
| H | 2.35785466  | 1.20220178  | 2.82516216  |
| H | 0.85087118  | 0.28919085  | 2.67942832  |
| H | 1.97895308  | -0.09338182 | 3.97187509  |
| N | 3.90423150  | -3.42973003 | 4.16839239  |
| C | 4.02175702  | -3.87111045 | 5.54817867  |
| C | 3.31479800  | -2.95461682 | 6.52295484  |
| H | 3.72552383  | -1.95552823 | 6.43521365  |
| C | 3.43581434  | -3.43586034 | 7.96498090  |
| H | 3.05860027  | -4.45746217 | 8.07677952  |
| H | 4.48150156  | -3.51953980 | 8.20858228  |
| C | 2.72306245  | -2.52718533 | 8.97343424  |
| H | 2.87153437  | -2.93605725 | 9.95973450  |
| H | 3.11535351  | -1.54389549 | 8.97358722  |
| H | 1.64523874  | -2.48800390 | 8.72126123  |
| H | 2.21640821  | -2.90130060 | 6.22874096  |
| H | 4.34823537  | -4.01852641 | 3.45291026  |
| H | -0.66867788 | 1.30955231  | -3.67421837 |
| H | 5.05609284  | -3.93605218 | 5.81400251  |
| H | 3.58915865  | -4.88561731 | 5.61621620  |

Table S3.4:CI(AT/9\_11-cis)

|   |             |             |             |
|---|-------------|-------------|-------------|
| C | -4.13411262 | 2.15380344  | -5.29770960 |
| C | -4.09853177 | 1.94770234  | -3.79841282 |
| C | -2.65605756 | 1.92548709  | -3.29327127 |
| C | -1.55734568 | 1.77265453  | -4.05204000 |
| C | -1.66077145 | 1.55713415  | -5.57088302 |
| C | -3.12736021 | 1.22909757  | -5.99349431 |
| H | -5.16962208 | 1.95601817  | -5.66939913 |
| H | -4.72050599 | 2.73519130  | -3.29790912 |
| H | -3.35188031 | 0.20785974  | -5.69528912 |
| H | -3.25321615 | 1.31658276  | -7.09617237 |
| H | -3.93669769 | 3.19308496  | -5.50631886 |
| H | -4.66055045 | 0.99621766  | -3.53586538 |
| C | -1.25911423 | 2.82552039  | -6.38133807 |
| H | -0.24496187 | 3.11208959  | -6.19835438 |
| H | -1.34804723 | 2.57463327  | -7.46040275 |
| H | -1.91463818 | 3.68378097  | -6.15660545 |
| C | -0.76220213 | 0.38707264  | -6.15008499 |
| H | 0.19324715  | 0.80507801  | -6.54036280 |
| H | -0.49847425 | -0.43334508 | -5.49158434 |
| H | -1.23458328 | -0.07459748 | -7.03384039 |
| C | -2.59677046 | 2.09072950  | -1.76476837 |
| H | -2.42203519 | 1.12064343  | -1.28878739 |
| H | -1.72452071 | 2.66787758  | -1.47617408 |
| H | -3.44316939 | 2.55721411  | -1.29831429 |
| C | -0.19566779 | 1.71223835  | -3.51239948 |
| H | 0.51864628  | 2.08120467  | -4.25970458 |
| C | 0.33237862  | 1.36457723  | -2.31090752 |
| H | -0.36325896 | 1.10352404  | -1.49293158 |
| C | 1.68195208  | 1.29089893  | -1.88487330 |
| C | 2.03278627  | 1.12710825  | -0.42334169 |
| C | 1.12904400  | 1.26396561  | 0.58888738  |
| H | 0.01339223  | 1.41368262  | 0.42670230  |
| C | 1.40360935  | 0.89809025  | 2.03386410  |
| H | 1.79468347  | 1.66532538  | 2.78256029  |
| C | 1.33028637  | -0.43130187 | 2.47432191  |
| C | 1.75919705  | -0.72606994 | 3.79488647  |
| H | 2.09996378  | 0.06011426  | 4.41721209  |
| C | 1.65527293  | -2.00115536 | 4.42485161  |
| H | 1.27101500  | -2.85406577 | 3.89013473  |
| C | 2.70525510  | 1.63804852  | -2.90142237 |
| H | 2.49193149  | 1.25730674  | -3.89792755 |
| H | 2.78641919  | 2.72729697  | -3.05687587 |
| H | 3.70567425  | 1.30058485  | -2.60174785 |
| C | 0.75573714  | -1.51531477 | 1.54666397  |
| H | 1.02762241  | -2.55004027 | 1.78450073  |
| H | -0.34583010 | -1.46363445 | 1.46555165  |
| H | 1.06720928  | -1.33235717 | 0.52783613  |
| N | 1.97616724  | -2.10048046 | 5.69412917  |
| C | 2.18386229  | -3.34763691 | 6.36488719  |
| H | 1.88486021  | -4.09709352 | 5.66306383  |
| C | 1.37646394  | -3.54600742 | 7.67827612  |
| H | 1.80328440  | -2.97126191 | 8.50705916  |
| C | 1.30828969  | -5.04021292 | 8.03126311  |
| H | 0.83527948  | -5.56551109 | 7.19214116  |
| H | 2.33961109  | -5.40979227 | 8.12520356  |
| C | 0.51826951  | -5.22543520 | 9.33055644  |
| H | 0.38991584  | -6.25731592 | 9.66400203  |
| H | 0.95677979  | -4.67290534 | 10.17521918 |
| H | -0.50981497 | -4.85836081 | 9.20667618  |
| H | 3.28174026  | -3.44285781 | 6.51968166  |
| H | 0.32110854  | -3.12538167 | 7.56128068  |
| H | 2.14956432  | -1.32131732 | 6.32544792  |
| H | 3.11928631  | 1.13573772  | -0.10631009 |



Table S3.5: CI(11-cis/11\_14-cis)

|   |             |             |             |
|---|-------------|-------------|-------------|
| C | -6.41344290 | 2.18909648  | -1.40255360 |
| C | -4.98242328 | 2.63739299  | -1.11561125 |
| C | -4.14328246 | 1.68384800  | -0.37881528 |
| C | -4.59789402 | 0.51577951  | 0.16013683  |
| C | -6.09666330 | 0.25434649  | 0.17583306  |
| C | -6.91045118 | 1.52384329  | -0.07150240 |
| H | -7.09924719 | 2.99150670  | -1.55418239 |
| H | -4.43994170 | 2.92607708  | -2.01079568 |
| H | -6.71863482 | 2.25989129  | 0.71097991  |
| H | -7.98375999 | 1.35495476  | -0.09492952 |
| H | -6.44475955 | 1.48621726  | -2.22671641 |
| H | -5.08591524 | 3.55714437  | -0.46787659 |
| C | -6.47545133 | -0.80725936 | -0.82388152 |
| H | -5.91693875 | -1.73534502 | -0.55277536 |
| H | -7.57155647 | -0.98751812 | -0.82606054 |
| H | -6.08609754 | -0.52376065 | -1.83203055 |
| C | -6.49357269 | -0.24941873 | 1.59362084  |
| H | -7.55841152 | -0.50053447 | 1.66694419  |
| H | -5.96690412 | -1.23136465 | 1.75387802  |
| H | -6.16604342 | 0.42162270  | 2.37272728  |
| C | -2.72586458 | 2.19455023  | -0.19553122 |
| H | -2.21129643 | 1.91726023  | 0.72522381  |
| H | -2.06438103 | 1.90059941  | -1.04990716 |
| H | -2.77818202 | 3.29548893  | -0.18212521 |
| C | -3.76506346 | -0.58899534 | 0.60520955  |
| H | -4.30244875 | -1.36476221 | 1.14710428  |
| C | -2.39798606 | -0.77526496 | 0.46338672  |
| H | -1.83675856 | -0.04361208 | -0.09420661 |
| C | -1.58010853 | -1.85982299 | 0.89071470  |
| C | -0.26395244 | -1.76960075 | 0.44162134  |
| H | 0.01843218  | -0.85846762 | -0.14136912 |
| C | 0.77390486  | -2.67671595 | 0.59564227  |
| H | 0.56658370  | -3.57467292 | 1.14632797  |
| C | 2.11083071  | -2.55527207 | 0.19363597  |
| C | 2.87536770  | -1.53849916 | -0.43782947 |
| C | 4.22108609  | -1.80256419 | -0.55637301 |
| H | 4.56396239  | -2.77068592 | -0.09506037 |
| C | 5.19690572  | -0.81038878 | -1.12010496 |
| C | -2.13849352 | -3.09272471 | 1.57021619  |
| H | -1.52300163 | -3.44200126 | 2.42809117  |
| H | -3.16486857 | -2.95452776 | 1.91101848  |
| H | -2.14214988 | -4.03771530 | 0.87333832  |
| C | 2.35441082  | -0.23225995 | -0.98248029 |
| H | 1.46215397  | -0.33265306 | -1.62697564 |
| H | 2.01415421  | 0.42884009  | -0.07874541 |
| H | 3.11639621  | 0.33673085  | -1.52241366 |
| H | 2.71376984  | -3.39542546 | 0.55406890  |
| N | 6.02309821  | -0.15264187 | -0.20078263 |
| C | 6.80230871  | 0.98635336  | -0.63658583 |
| C | 7.96162698  | 1.20599975  | 0.32308882  |
| C | 8.87129783  | 2.36457952  | -0.02338521 |
| H | 9.16426026  | 2.28125412  | -1.08935426 |
| H | 8.34328338  | 3.32962376  | -0.07326973 |
| C | 10.15741462 | 2.44977301  | 0.86225431  |
| H | 10.70553264 | 3.36650830  | 0.63105465  |
| H | 9.94959772  | 2.47521848  | 1.97549237  |
| H | 10.82637749 | 1.61235950  | 0.67931499  |
| H | 5.65891790  | -1.19196618 | -2.03922305 |
| H | 5.73965578  | -0.15546405 | 0.78690929  |
| H | 6.23138514  | 1.94171173  | -0.69423864 |
| H | 7.31751918  | 0.77696613  | -1.59003409 |
| H | 7.55716048  | 1.33556810  | 1.34170359  |
| H | 8.58855631  | 0.28631185  | 0.36854673  |

Table S3.6: CI(11-cis/9\_11-cis)

|   |              |             |             |
|---|--------------|-------------|-------------|
| C | 7.13784036   | 1.84663927  | 1.00743654  |
| C | 6.05138502   | 2.44191236  | 0.11219683  |
| C | 4.87161935   | 1.52963836  | -0.17508902 |
| C | 4.90171284   | 0.19688602  | 0.06921521  |
| C | 6.25228393   | -0.44693631 | 0.54852077  |
| C | 7.47792701   | 0.49402054  | 0.42056081  |
| H | 8.01788839   | 2.50415955  | 1.03941456  |
| H | 5.68264895   | 3.39805700  | 0.51274146  |
| H | 7.76977290   | 0.62259772  | -0.62646630 |
| H | 8.29884446   | -0.01558728 | 0.92965335  |
| H | 6.76409404   | 1.75225139  | 2.03526270  |
| H | 6.52205535   | 2.70078897  | -0.84963539 |
| C | 6.10258315   | -0.92408220 | 2.05111043  |
| H | 5.28123951   | -1.63074241 | 2.19516621  |
| H | 7.02586783   | -1.40595162 | 2.37681320  |
| H | 5.92533237   | -0.08045634 | 2.71940093  |
| C | 6.61615297   | -1.75318918 | -0.28017855 |
| H | 7.64106231   | -2.07356730 | -0.08155777 |
| H | 5.95703814   | -2.59554492 | -0.02833488 |
| H | 6.51691462   | -1.56955100 | -1.35639999 |
| C | 3.70227393   | 2.15027858  | -0.86220817 |
| H | 4.10188030   | 2.89709267  | -1.55816067 |
| H | 3.15101679   | 1.42577946  | -1.45123770 |
| H | 3.01983271   | 2.68532270  | -0.19316073 |
| C | 3.82674080   | -0.75103755 | -0.03820525 |
| H | 4.13435824   | -1.79042347 | 0.08456540  |
| C | 2.42325649   | -0.53004771 | -0.14075317 |
| H | 2.06349880   | 0.47974241  | -0.08070874 |
| C | 1.48526805   | -1.50514864 | -0.30169355 |
| C | 0.07930298   | -1.13090393 | -0.28804908 |
| C | -0.58840851  | -0.84171421 | -1.44455624 |
| C | -1.98769708  | -0.53051534 | -1.59218483 |
| C | -2.96990543  | -0.00601586 | -0.67430122 |
| C | -4.25146765  | 0.17217913  | -1.24990462 |
| H | -4.43630271  | -0.11455464 | -2.28149829 |
| C | -5.34746780  | 0.63494065  | -0.43486435 |
| H | -5.14219902  | 0.66878736  | 0.63884339  |
| C | 1.75688811   | -3.03274539 | -0.46127610 |
| H | 1.38014223   | -3.47708825 | -1.39424197 |
| H | 2.83428394   | -3.14860504 | -0.46825367 |
| H | 1.38690709   | -3.62771147 | 0.38338962  |
| C | -2.51924151  | 0.26617526  | 0.74493490  |
| H | -1.49610311  | 0.65226766  | 0.76073103  |
| H | -3.14677970  | 1.00037979  | 1.24615168  |
| H | -2.55124035  | -0.64806975 | 1.34432777  |
| H | -2.37161073  | -0.61535594 | -2.60513746 |
| N | -6.56067732  | 0.90713672  | -0.80107097 |
| C | -7.72171394  | 1.22909778  | 0.02139337  |
| H | -7.33629203  | 1.64361820  | 0.96256128  |
| C | -8.58962292  | 0.00207658  | 0.35310211  |
| H | -8.97461337  | -0.43526899 | -0.58360698 |
| C | -9.76834745  | 0.40872112  | 1.24155289  |
| H | -9.39438494  | 0.89275207  | 2.15640230  |
| H | -10.36205981 | 1.15906279  | 0.70841744  |
| C | -10.64209644 | -0.80559325 | 1.60390954  |
| H | -11.47285192 | -0.55234678 | 2.26778890  |
| H | -11.05825513 | -1.22268337 | 0.68144936  |
| H | -10.03541233 | -1.58096093 | 2.07954821  |
| H | -8.24404920  | 2.03628118  | -0.49643542 |
| H | -7.94885830  | -0.76121806 | 0.81552260  |
| H | -6.77869254  | 0.89075366  | -1.80733844 |
| H | -0.44255067  | -1.14085603 | 0.66744145  |
| H | -0.00812405  | -0.97925144 | -2.36071573 |

Table S3.7: CI(AT/9-cis)

|   |             |             |             |
|---|-------------|-------------|-------------|
| C | -4.93013175 | -2.12479353 | -5.02657595 |
| C | -4.90695115 | -2.10755716 | -3.51490926 |
| C | -3.57376063 | -2.02505024 | -2.89340077 |
| C | -2.40469190 | -2.40567922 | -3.56543296 |
| C | -2.46279875 | -2.82646698 | -5.09636262 |
| C | -3.89380117 | -3.11183676 | -5.53489669 |
| H | -5.94692758 | -2.38631989 | -5.34288855 |
| H | -5.51004383 | -1.29972438 | -3.10204009 |
| H | -4.11544701 | -4.11931348 | -5.15280711 |
| H | -3.99486076 | -3.16314667 | -6.62512825 |
| H | -4.72627402 | -1.12885249 | -5.42116722 |
| H | -5.36323023 | -3.04153123 | -3.16376488 |
| C | -1.84094559 | -1.68275796 | -5.93556447 |
| H | -0.85265244 | -1.37507175 | -5.57251192 |
| H | -1.75894231 | -2.00444886 | -6.96862044 |
| H | -2.50038277 | -0.81038219 | -5.89518794 |
| C | -1.63640790 | -4.08890266 | -5.39862442 |
| H | -1.77751287 | -4.36304637 | -6.44543189 |
| H | -0.56531074 | -4.01774543 | -5.18385512 |
| H | -2.07241876 | -4.86979007 | -4.79241172 |
| C | -3.84736147 | -1.62606179 | -1.44546655 |
| H | -4.84783512 | -1.96896593 | -1.10131933 |
| H | -3.13407199 | -2.00689724 | -0.65632872 |
| H | -3.78288111 | -0.51318156 | -1.36219075 |
| C | -1.05572476 | -2.41411806 | -3.04825286 |
| H | -0.26363568 | -2.85122452 | -3.67085951 |
| C | -0.53916354 | -1.98718852 | -1.78047923 |
| H | -1.20961841 | -1.60475436 | -1.05707738 |
| C | 0.74256234  | -2.07994171 | -1.34388433 |
| C | 0.96828969  | -1.69817812 | 0.07527474  |
| H | 0.90751473  | -2.48376519 | 0.80122223  |
| C | 1.15270820  | -0.46167923 | 0.47477110  |
| H | 1.22612207  | 0.35717625  | -0.22426534 |
| C | 1.32080587  | -0.03221662 | 1.83985468  |
| H | 1.28207393  | -0.80392436 | 2.58266043  |
| C | 1.54522738  | 1.25972948  | 2.31493526  |
| C | 1.77072764  | 1.41964012  | 3.70040291  |
| H | 1.72561957  | 0.52119102  | 4.35185026  |
| C | 2.06960525  | 2.58007802  | 4.43232219  |
| H | 2.15470764  | 3.50224373  | 3.87313241  |
| C | 2.07434040  | -2.31530062 | -2.23564178 |
| H | 2.76171787  | -3.11141581 | -1.92968930 |
| H | 1.69531184  | -2.58240394 | -3.24061895 |
| H | 2.63505606  | -1.39102179 | -2.30635164 |
| C | 1.52490298  | 2.50465689  | 1.49202912  |
| H | 1.37990520  | 2.26985817  | 0.44109894  |
| H | 0.70618671  | 3.16322409  | 1.78102341  |
| H | 2.47099221  | 3.03773896  | 1.56084409  |
| N | 2.21261550  | 2.59902774  | 5.73395904  |
| C | 2.50537963  | 3.81816205  | 6.54375332  |
| C | 3.55859896  | 4.73268643  | 5.93820872  |
| H | 4.42087606  | 4.08144357  | 5.76875432  |
| C | 3.86266246  | 5.91285879  | 6.86537866  |
| H | 3.01526168  | 6.61873558  | 6.84714998  |
| H | 3.96005690  | 5.55797094  | 7.90438059  |
| C | 5.09146286  | 6.67890135  | 6.37686199  |
| H | 5.25386979  | 7.53878819  | 7.02718011  |
| H | 5.98631761  | 6.06120909  | 6.39728052  |
| H | 4.94012409  | 7.04116279  | 5.36739229  |
| H | 3.25001004  | 5.10979117  | 4.96338517  |
| H | 2.11774872  | 1.75068008  | 6.27546718  |
| H | 1.59095173  | 4.34142322  | 6.70608836  |
| H | 2.80303442  | 3.45547523  | 7.50481615  |
